# Supplementary material for: Revealing Synergistic Mechanism of Multiple Components in Gandi Capsule for Diabetic Nephropathy Therapeutics by Network Pharmacology
Source: Evid Based Complement Alternat Med. 2018 Apr 26;2018:6503126. doi: 10.1155/2018/6503126 (PMC5944259; doi:10.1155/2018/6503126)
Supplement: Supplementary Materials — Six files have been uploaded as supplementary materials for this research. The first file is the WORD file of the appendix, which has two forms. One is the target protein database, and the other is the form of valid results between the compounds and proteins in docking. The second file is an EXCEL file of the compound database including 315 compounds. The third file is the graphical abstract in PDF, which shows the main process of the research with pictures. The fourth file is a form with three sheets in EXCEL format, which includes total results of docking, valid results of docking, and high affinity results of docking. Meanwhile, the fifth file and the sixth file are EXCEL files of the network diagram of representative target-compound networks and target-compound-pathway networks, respectively. [file 6503126.f1.zip › 6503126.f1/compound database.xlsx]

## Sheet: Sheet1
	黄芪
编号	成分分类	化学成分	英文名	分子式	结构式	分子质量	氢给体数	氢受体数	可旋转键数	极性表面面积	logP	手性中心数	分子弹性指数	作用药理
1	黄芪多糖	L-鼠李糖	L-rhamnose	C18H36O15R		182.1718								降低蛋白酪氨酸磷酸酶1B表达，调节肌内PKB/GLUT4信号通路，影响肾皮质内NF-kB，IKB的mRNA表达，改善早期糖尿病肾病症状，减少干内质网应激，维持糖稳态
2		L-阿拉伯糖（果胶糖）		C5H10O5		150.13
3		D/L-核糖	D-ribose	C5H10O5		150.13
4		D/L-木糖		C5H10O5		150.13
5		MAPS-5
6	黄芪总皂苷	黄芪皂苷I	astragalosideI	C46H74O15		869.0436	7	16	18	240.36	2.453			抗肾氧化作用，减少脂解过氧化
7		黄芪皂苷II	astragalosideII	C43H70O15		827.0069	8	15	17	234.29	1.884
8		黄芪皂苷III	astragalosideⅢ	C41H68O14		784.97	9	14	16	228.22	1.824
9		黄芪皂苷IV（即黄芪甲苷）含量最高	astragalosideⅣ	C41H68O14		784.97	9	14	16	228.22	0.628			诱导TNF-α分泌，降低直接作用+作用于肝糖调节酶+通过上调Sarco/内质网Ca2 + -ATP酶2的表达。抑制足细胞介导的细胞凋亡的内质网应激
10		黄芪皂苷V	astragalosideⅤ	C47H78O19										阻碍羧甲基赖氨酸、戊糖苷形成，抑制糖尿病视网膜病变、神经病变进程
11		黄芪皂苷VI	astragalosideⅥ	C47H78O19		947.1108	12	19	22	307.37	-0.172
12		黄芪皂苷VII	astragalosideⅦ	C47H80O19
13		异黄芪皂苷I	isoastragalosideI	C45H72O16
14		异黄芪皂苷II	isoastragalosideII	C43H70O15		827.0069	8	15	17	234.29	1.488
15		大豆皂苷I	soyasaponinI	C48H78O18
16		cyclocephaloside
17		trojanoside A
18		trojanoside h
19	黄芪黄酮	毛蕊异黄酮	calycosin	C16H12O5		284.264	2	5	4	75.99	1.326	0
20		刺芒柄花素	formononetin	C16H12O4		270.2764	1	4	3	55.76	2.86
21		槲皮素	quercetol / querceton	C15H10O7		302.2357	2	7	6	127.45	1.989
22		芦丁（芸香苷）	rutin / rutoside	C27H30O16		610.5175	10	16	16	265.52	0.903
	山茱萸
	成分分类	化学成分	英文名	分子式	结构式	分子质量	氢给体数	氢受体数	可旋转键数	极性表面面积	logP	手性中心数	分子弹性指数	作用药理
	五环三萜类	熊果酸	ursolic acid	C30H48O3		456.7	2	3	2	57.53	8.731
		2α-羟基熊果酸	2α-hydroxy ursolic acid	C30H48O4		472.7	3	4	3	77.76	7.113
		齐墩果酸	oleanolic acid	C30H48O3		456.7	2	3	2	57.53	8.576
		阿江榄仁树葡萄苷II
	环烯醚萜类（环戊烷型）	马鞭草苷（山茱萸苷）	verbenalin	C17H24O10		388.366	4	10	9	151.98	-1.915
		马钱子苷	loganin	C17H26O10		390.3823	5	10	10	155.14	-1.985
		7-脱氢马钱子苷
	环烯醚萜类（裂环）	莫诺苷	Morroniside	C17H26O11		406.384
		7-O-甲基莫诺苷	Methyl morroniside	C18H28O11		420.411
		7-O-乙基莫诺苷	7-O-Ethylmorroniside	C19H30O11		434.438
		7-O-丁基莫诺苷
		脱水莫诺苷
		山茱萸新苷	Cornuside	C24H30O14		542.49
		獐牙菜苷	Sweroside	C16H22O9		358.343
	环烯醚萜类（双环）	山茱萸新苷II（马钱子苷和莫诺苷相连）
	水解鞣质类	异柯子素	isoterchebin	C41H30O27
		喜树鞣质A
		喜树鞣质B
		7-O-没食子酰-D景天庚酮糖苷
		1,2-二-O-没食子酰-β-D-葡萄糖苷	2,3-di-O-galloyl-β-D-glucose
		1,2，3-三-O-没食子酰-β-D-葡萄糖苷	1,2,3-tri-O-galloyl-β-D-glucopyranoside
		马桑素F
		特里马素I
		特里马素II
	黄酮类	山奈酚	kaempferide	C16H12O6		300.2629	3	6	5	96.22	3.499
		山奈酚-3-O-β-D-葡萄糖苷
		槲皮素	quercetol / querceton	C15H10O7		302.2357	2	7	6	127.45	1.989
		柚皮素
		3-O-β-吡喃型半乳糖苷-飞燕草苷元
		3-O-β-吡喃型半乳糖苷-矢车菊苷元
		3-O-β-吡喃型半乳糖苷-天竺葵苷元
	有机酸及脂类	对羟基桂皮酸
		没食子酸
		没食子甲酯
		原儿茶酸
		白桦脂酸
		苹果酸
	其他	β-谷甾醇	β-sitosterol	C29H50O
		胡萝卜苷	alexandrin	C35H60O6		576.8473	4	6	13	99.38	8.17	10
		5-羟甲基羟醛
	生地黄
	成分分类	化学成分	英文名	分子式	结构式	分子质量	氢给体数	氢受体数	可旋转键数	极性表面面积	logP	手性中心数	分子弹性指数	作用药理
	环烯醚萜苷	梓醇（含量最高）	catalpol / catalpinoside	C15H22O10		362.329								有降糖作用	酸碱高温下可分解，分解后变黑
		二氢梓醇
		乙酰梓醇
		益母草苷	leonuride	C15H24O9
		桃叶珊瑚苷	aucuboside / aucubin	C15H22O9		346.3298	6	9	10	149.07	-4.103
		单蜜力特苷
		蜜力特苷
		rehmaglutin A(地黄素)
		rehmaglutin B
		rehmaglutin C
		rehmaglutin D
		acteoside（麦角甾醇）01%左右	ergosterol	C28H44O
		地黄苷A	rehmannioside A	C21H32O15
		地黄苷B	rehmannioside B	C21H32O15
		地黄苷C	rehmannioside C	C20H32O14		496.46	9	14	15	228.22	-5.828
		地黄苷D	rehmaglutin D	C9H13ClO4		220.6501	2	4	2	58.92	-0.098
	糖类及其他苷类	水苏糖（最高）	stachyose	C24H42O21										胀气副作用，炮制可减少水苏糖的量
		棉子糖	raffinose	C18H18O7
		甘露三糖	manninotriose	C18H32O16
		毛蕊花糖	verbascose	C30H52O26		828.7183	17	26	31	426.98	-8.307
		半乳糖	galactose	C6H12O6		180.1559	5	6	10	118.22	-3.29
		地黄多糖A
		地黄多糖B
	其他	5-羟甲基糠醛	5-hydroxymethylfurfural	C6H6O3		126					-0.45
	益母草
	成分分类	化学成分	英文名	分子式	结构式	分子质量	氢给体数	氢受体数	可旋转键数	极性表面面积	logP	手性中心数	分子弹性指数	作用药理
	生物碱类	益母草碱（主要成分）	leonurine	C14H21N3O5		311.334	5	8	10	126.89	1.695			抗血小板作用
		水苏碱（主要成分）	stachydrine	C7H13NO2		143.1836	1	3	1	40.13	-2.895
		益母草啶
		益母草宁
	黄酮类	汉黄芩素	wogonin	C16H12O5		284.2635	2	5	4	75.99	2.244
		大豆素	daidzein	C15H10O4		256.23					2.97
		槲皮素	quercetol / querceton	C15H10O7		302.2357	2	7	6	127.45	1.989
		芦丁	rutin / rutoside	C27H30O16		610.5175	10	16	16	265.52	0.903
		山奈素
		益母草酮
		3,4,5,5,7-五甲氧基黄酮
	二萜类	前益母草素	preleoheterin	C20H30O4
		益母草素	leoheterin	C20H30O4
		前益母草乙素
	环形多肽类	多肽益母草宁
		cycloleomuripeptideE
		cycloleomuripeptideF
		cycloleonurinin
		环益母草多肽A
		环益母草多肽B
		环益母草多肽C
	苷类（苯丙醇烯类）	毛蕊花苷	verbascoside	C29H36O15
		益母草苷	leonuride	C15H24O9
	挥发油类	顺/反-石竹烯
		桉油精
		丁香醛	syringaldehyde	C9H10O4		182.173	1	4	4	55.76	1.304
	其他	阿魏酸	ferulic acid	C10H10O4		194.184	2	4	4	66.76	0.963
		益母草多糖
		β-谷甾醇	β-sitosterol	C29H50O		416.6992					10.45
	槐花（槐米）
	成分分类	化学成分	英文名	分子式	结构式	分子质量	氢给体数	氢受体数	可旋转键数	极性表面面积	logP	手性中心数	分子弹性指数	作用药理
	黄酮类	芦丁（芸香苷）含量最高	rutin / rutoside	C27H30O16		610.5175	10	16	16	265.52	0.903
	三萜皂苷类	赤豆皂苷I
		赤豆皂苷II	azukisaponinII	C42H68O14
		赤豆皂苷V
		大豆皂苷I	soyasaponinI	C48H78O18
		大豆皂苷III	soyasponinⅢ	C42H68O14
		槐花皂苷I
		槐花皂苷II	kaikasaponinII	C48H78O17
		槐花皂苷III	kaikasaponinIII	C48H78O17
	黄酮类	槲皮素	quercetol / querceton	C15H10O7		302.2357	2	7	6	127.45	1.989
		异鼠李素	isorhamnetin	C16H12O7		316.2623	4	7	6	116.45	2.787
		白桦脂醇	betulin	C30H50O2							9.01
		槐花二醇	sophoradiol	C30H50O2
		槐花米甲素
		山奈酚（山奈素）	kaempferide	C16H12O6		300.2629	3	6	5	96.22	3.499
	脂肪酸	月桂酸	lauric acid	C12H24O2		200.3178	1	2	10	37.3	4.773
		肉豆蔻酸（十四烷酸）	myristic acid	C14H28O2		230.363					6.11
		β-谷甾醇	β-sitosterol	C29H50O		416.6992					10.45
	黄芩
	成分分类	化学成分	英文名	分子式	结构式	分子质量	氢给体数	氢受体数	可旋转键数	极性表面面积	logP	手性中心数	分子弹性指数	作用药理
	黄酮类	黄芩苷	baicalin	C21H18O11		446.361	6	11	9	183.21	1.431
		黄芩苷元（黄芩素）	baicalein	C15H10O5		270.2369	3	5	4	86.99	3.641
		汉黄芩素	wogonin	C16H12O5		284.2635	2	5	4	75.99	2.244
		汉黄芩苷	wogonoside	C22H20O11		460.3876	5	11	9	172.21	-0.097
		圣草素	eriodictyol	C15H12O6
		鼠尾草素
		千层纸素
		韧黄芩素-I
		韧黄芩素-II	tenaxinII	C16H12O6		300.2629	3	6	5	96.22	2.807
		粘毛黄芩素 II	viscidulinII	C17H14O7		330.2889	3	7	6	105.45	2.396
		白杨黄素	chrysin	C15H10O4		254.2375	2	4	3	66.76	3.133
		木蝴蝶素	oroxylin	C16H12O5		284.2635	2	5	4	75.99	3.042
		红花素	carthamidin	C15H12O6		288.2522	4	6	5	107.22	2.147
	苯乙醇苷	毛柳苷	salidroside	C14H20O7		300.3044	5	7	10	119.661	-1.324
		daren-dosideA
		darendsideB
	挥发油类	异戊二烯
		乙酰苯
		薄荷酮	menthone	C10H18O		154.249	0	1	1	17.07	2.755
		β-广藿香烯	β-patchoulene	C15H24		204.351	0	0	0	0	6.129
		α-愈创木烯	α-guaiene	C15H24		204.351	0	0	1	0	6.602
		抗氧化剂BHA（丁基羟基茴香醚）
		β-芹子烯	β-selinene	C15H24		204.351	0	0	1	0	6.327
	其他	豆甾醇	stigmasterol	C29H48O
	僵蚕
	成分分类	化学成分	英文名	分子式	结构式	分子质量	氢给体数	氢受体数	可旋转键数	极性表面面积	logP	手性中心数	分子弹性指数	作用药理
	氨基酸（45-70%）	谷氨酸	glutamic acid	C5H9NO4
		丙氨酸	alanine	C3H7NO2		91.0857
		缬氨酸	valine	C5H11NO2		117.1463	3	3	3	63.32	0.289
	草酸铵（含量高）	草酸铵（含量高）
	脂肪酸	亚油酸	linoleic acid	C18H32O2
		棕榈酸（软脂酸）	cetylic acid	C16H32O2		260.44	1	2	14	37.3	6.811
		油酸	oleic acid	C18H34O2
		柠檬酸（糖代谢相关）
	黄酮类	槲皮素	quercetol / querceton	C15H10O7		302.2357	2	7	6	127.45	1.989
		山奈酚	kaempferide	C16H12O6		300.2629	3	6	5	96.22	3.499
		木犀草素	luteolin	C15H10O6		286.236	4	6	5	107.22	2.695
	毒素	白僵菌素	beauverician	C45H57N3O9
		白僵菌环缩醇酸肽 A	beauverolide A	C30H47N3O5		529.718.
		白僵菌黄色素	bassianin	C23H25NO5		395.4483	3	6	10	98.07	4.885
	余甘子
	成分分类	化学成分	英文名	分子式	结构式	分子质量	氢给体数	氢受体数	可旋转键数	极性表面面积	logP	手性中心数	分子弹性指数	作用药理	余甘子提取物可调控胰岛素介导的磷脂酰肌醇 －３ －激酶／蛋白激酶 Ｂ／葡萄糖转 运 蛋 ４ 信 号转 导 通 路，而降糖
	黄酮类	槲皮素	quercetol / querceton	C15H10O7		302.2357	2	7	6	127.45	1.989
		5，7，4-三羟基-1-黄酮醇
		汉黄芩素	wogonoside	C22H20O11		460.3876	5	11	9	172.21	-0.097
	酚类	山奈酚	kaempferide	C16H12O6		300.2629	3	6	5	96.22	3.499
		没食子鞣质
		葡萄糖没食子鞣苷	glucogallin	C13H16O10
		邻苯三酚
		3,3-二羟基-4-丙烯基-2,2-二羧基联苯
		油柑酚
	甾醇类	p-谷甾醇
		偶氮甘氨酸二甲酯
	有机酸	没食子酸	gallic acid	C7H6O5		170.119	4	5	4	97.99	0.531
		原诃子酸	terchebin	C41H30O27
		诃子酸	chebulinic acid	C41H32O27		956.69
		诃子次酸	chebulic acid	C14H12O11
		柯黎勒酸	chebulagic acid	C41H30O27		954.67
		油柑酸
		鞣花酸
	糖类	3,6-二没食子酰葡萄糖	3,6-digalloyl glucose	C20H20O14		484.364	9	14	20	251.74	-0.839
	其他	飞燕草素	delphinidin	C15H13ClO7

## Sheet: 药材总成分
编号		药材	化学成分	英文名	分子式
1	1	地黄	梓醇甙元-α-L-呋喃阿拉伯糖甙	catalpolgenin-α-L-arabinofuranoside
2	2	地黄	D-甘露醇	D-mannitol	C6H14O6
3	3	地黄	地黄甙 D	rehmannioside D	C27H42O20
4	4	地黄	地黄甙 C	rehmannioside C	C21H34O14
5	5	地黄	腺(嘌呤核)甙	adenosine	C10H13N5O4
6	6	地黄	焦地黄甙 B	jioglutoside B	C23H34O13
7	7	地黄	筋骨草甙	ajugoside	C17H26O10
8	8	地黄	棉子糖	raffinose	C18H18O7
9	9	地黄	葡萄糖胺	glucosamine	C6H13NO5
10	10	地黄	焦地黄甙 A	jioglutoside A	C14H20O9
11	11	地黄	梓醇	catalpol	C15H22O10
12	12	地黄	梓果次甙	catalpinoside	C15H22O10
13	13	地黄	筋骨草醇	ajugol	C15H24O9
14	14	地黄	益母草甙	leonuride	C15H24O9
15	15	地黄	桃叶珊瑚甙	aucuboside	C15H22O9
16	16	地黄	都桷子甙	geniposide	C17H24O10
17	17	地黄	美利妥双甙	melittoside	C22H34O13
18	18	地黄	6-O-香草酰基筋骨草醇	6-O-vanilloyl ajugol	C23H30O12
19	19	地黄	8-表马钱子甙酸	8-epiloganic acid	C16H24O10
20	20	地黄	6-O-Z-阿魏酰基筋骨草醇	6-O-Z-feruloyl ajugol	C25H32O12
21	21	地黄	6-O-E-阿魏酰基筋骨草醇	6-O-E-feruloyl ajugol	C25H32O12
22	22	地黄	6-O-(4"-O-α-L-吡喃鼠李糖基)香草酰基筋骨草醇	6-O-(4"-O-α-L-rhamnopyranosyl)vanilloyl ajugol	C30H42O15
23	23	地黄	地黄甙 B	rehmannioside B	C21H32O15
24	24	地黄	地黄甙 A	rehmannioside A	C21H32O15
25	25	地黄	6-O-对-香豆酰基筋骨草醇	6-O-p-coumaroyl ajugol	C24H30O11
26	26	地黄	半乳糖	galactose	C6H12O6
27	27	地黄	虫草酸	cordycepic acid	C10H13N5O3
28	28	地黄	甘露三糖	manninotriose	C18H32O16
29	29	地黄	甘氨酸	glycine	C2H5NO2
30	30	地黄	毛蕊花糖	verbascose	C30H52O26
31	31	地黄	水苏糖	stachyose	C24H42O21
32	32	地黄	1-乙基-β-D-半乳糖甙	1-ethyl-β-D-galactoside	C8H16O6
33	33	地黄	磷酸	phosphoric acid	H2HO4P
34	1	槐花	异鼠李素-3-芸香糖甙		isohamnetin-3-rutinoside
35	2	槐花	十八碳二烯酸	octadecadienoic acid
36	3	槐花	十二碳烯酸	dodecenoic acid
37	4	槐花	槐花皂甙 II	kaikasaponinII	C48H78O17
38	5	槐花	槐花皂甙 III	kaikasaponinIII	C48H78O17
39	6	槐花	槐花皂甙 I	kaikasaponinI	C42H68O13
40	7	槐花	槐花二醇	sophoradiol	C30H50O2
41	8	槐花	赤豆皂甙 V	azukisaponinV	C48H78O18
42	9	槐花	3-O-[β-D-吡喃葡萄糖基(1→2)-β-D-吡喃葡萄糖醛酸基]大豆皂醇 B	3-O-[β-D-glucopyranosyl(1→2)-β-D-glucuronopyranosyl]-soyasapogenol B	C42H68O14
43	10	槐花	赤豆皂甙 II	azukisaponinII	C42H68O14
44	11	槐花	赤豆皂甙 I	azukisaponinI	C42H68O13
45	12	槐花	槲皮素-3'-甲醚	isorhamnetin	C16H12O7
46	13	槐花	异鼠李素	isorhamnetin	C16H12O7
47	14	槐花	白桦脂醇	betulin	C30H50O2
48	15	槐花	山柰酚-3-O-芸香糖甙	kaempferol-3-O-rhamnoglucoside	C28H32O14
49	16	槐花	槲皮素	quercetin	C15H10O7
50	17	槐花	大豆皂甙Ⅲ	soyasponinⅢ	C42H68O14
51	18	槐花	十四碳烯酸	tetradecenoic acid	C14H26O2
52	19	槐花	十四碳二烯酸	tetradecadienoic acid	C14H24O2
53	20	槐花	十六碳烯酸	hexadecenoic acid	C16H30O2
54	21	槐花	十八碳三烯酸	calendic acid	C18H30O2
55	22	槐花	二十(烷)酸	arachic acid	C20H40O2
56	1	黄芪	黄芪多糖Ⅲ	astrglalanⅢ
57	2	黄芪	黄芪多糖 II	astrglalanII
58	3	黄芪	黄芪多糖 I	astrglalanI
59	4	黄芪	刺芒柄花素-7-葡萄糖甙	formononetin-7-glucoside	C22H22O9
60	5	黄芪	杂多糖AH-2	heteropolysaccharide AH-2
61	6	黄芪	杂多糖AH-1	heteropolysaccharide AH-1
62	7	黄芪	膜荚黄芪甙 II	astramembranninII	C35H58O9
63	8	黄芪	梭果黄芪甙 B	asernestioside B	C49H80O19
64	9	黄芪	黄芪甙Ⅷ	astragalosideⅧ	C47H76O17
65	10	黄芪	黄芪甙Ⅶ	astragalosideⅦ	C47H80O19
66	11	黄芪	黄芪甙Ⅵ	astragalosideⅥ	C47H78O19
67	12	黄芪	黄芪甙Ⅴ	astragalosideⅤ	C47H78O19
68	13	黄芪	黄芪甙Ⅳ	astragalosideⅣ	C41H68O14
69	14	黄芪	黄芪甙Ⅲ	astragalosideⅢ	C41H68O14
70	15	黄芪	黄芪甙 II	astragalosideII	C44H72O14
71	16	黄芪	异黄芪甙 II	isoastragalosideII	C43H70O15
72	17	黄芪	精氨酸	arginine	C6H14N4O2
73	18	黄芪	膜荚黄芪甙 I	astramembranninI	C36H60O8
74	19	黄芪	鼠李柠檬素-3-O-葡萄糖甙	rhamnocitrin-3-O-glucoside	C22H22O11
75	20	黄芪	落叶松脂醇	lariciresinol	C20H24O6
76	21	黄芪	α-联苯双酯	dimethylene-dioxybiphenyl-2,2'-dicarboxylate	C20H18O10
77	22	黄芪	绵马黄芪甙 XV	astrasieversianin XV	C46H76O17
78	23	黄芪	5'-羟基微凸剑叶莎醇-2',5'-二-O-葡萄糖甙	5'-hydroxyiso-muronulatol-2',5'-di-O-glucoside	C29H38O16
79	24	黄芪	3-羟基-2-甲基吡啶	3-hydroxy-2-methylpyridine	C6H7NO
80	25	黄芪	13-羟基-9,11-十八碳二烯酸	13-hydroxy-9,11-octadecadienoic acid	C18H32O3
81	26	黄芪	2'-羟基―3',4'―二甲氧基异黄烷-7-O-β-D-葡萄糖甙	2'-hydroxy-3',4'-dimethoxyisoflavane-7-O-β-d-glucoside	C23H28O10
82	27	黄芪	脯氨酸	proline	C5H9NO2
83	28	黄芪	甜菜碱	betaine	C5H11NO2
84	29	黄芪	梭果黄芪甙 A	asernestioside A	C47H78O18
85	30	黄芪	黄芪甙 I	astragalosideI	C46H74O15
86	31	黄芪	黄芪异黄烷甙	mucronulatol-7-O-glucoside	C23H28O10
87	32	黄芪	γ-氨基丁酸	γ-aminobutyric acid	C4H9NO2
88	33	黄芪	胆碱	choline	C5H14NO(+)
89	34	黄芪	香豆精	coumarin	C9H6O2
90	35	黄芪	金翼黄芪甙 A	astrachrysoside A	C41H68O13
91	36	黄芪	鹰嘴豆芽素	biochain B	C16H12O4
92	37	黄芪	刺芒柄花素	formononetin	C16H12O4
93	38	黄芪	环黄芪醇-3-O-β―D―吡喃木糖基-25-O-β-D-吡喃葡萄糖甙	3-O-β-D-xylopyranosyl-25-O-β-D-glucopyranosylcycloastragenol	C41H68O14
94	39	黄芪	胡萝卜甙	alexandrin	C35H60O6
95	40	黄芪	刺五加甙 A	eleutheroside A	C35H60O6
96	41	黄芪	β-谷甾醇	β-sitosterol	C29H50O
97	42	黄芪	苍耳甙	daucosterol	C35H60O6
98	43	黄芪	羽扇烯酮	lupenone	C30H48O
99	44	黄芪	羽扇豆醇	lupeol	C30H50O
100	45	黄芪	槲皮素-3-O-葡萄糖甙	quercetin-3-O-glucoside	C21H20O12
101	46	黄芪	异槲皮甙	isoquercitrin	C21H20O12
102	47	黄芪	异微凸剑叶莎醇-7-O-葡萄糖甙	isomucronulatol-7-O-glucoside	C23H28O10
103	48	黄芪	异微凸剑叶莎醇-7,2'-二-O-葡萄糖甙	isomucronulatol-7,2'-di-O-glucosiole	C29H38O15
104	49	黄芪	异微凸剑叶莎醇	isomucronulatol	C17H18O5
105	50	黄芪	异黄芪甙 I	isoastragalosideI	C45H72O16
106	51	黄芪	7-O-甲基-异微凸剑叶莎醇	7-O-methylisomucronulatol	C18H20O5
107	52	黄芪	毛蕊异黄酮-7-O-葡萄糖甙	calycosin-7-O-glucoside	C22H22O10
108	53	黄芪	毛蕊异黄酮	calycosin	C16H12O5
109	54	黄芪	天冬素	asparamide	C4H8N2O3
110	55	黄芪	天(门)冬酰胺	asparagine	C4H8N2O3
111	56	黄芪	大豆皂甙 I	soyasaponinI	C48H78O18
112	57	黄芪	刀豆氨酸	canavanine	C5H12N4O3
113	58	黄芪	丁香树脂酚	syringaresinol	C22H26O8
114	59	黄芪	7,2'-二羟基-3',4'-二甲基异黄烷-7-O-β-D-吡喃葡萄糖甙	7,2'-dihydroxy-3',4'-dimethylisoflavane-7-O-β-D-glucopyranoside	C23H28O10
115	60	黄芪	熊竹素	kumatakenin	C17H14O6
116	61	黄芪	7,2'-二羟基-3',4'-二甲氧基异黄酮-7-O-β-D-葡萄糖甙	7,2'-dihydroxy-3',4'-dimethoxyisoflavone-7-O-β-D-glucoside	C23H24O11
117	62	黄芪	7,2'-二羟基-3',4'-二甲氧基异黄烷-7-O-β-D-葡萄糖甙	7,2'-dihydroxy-3',4'-dimethoxyisoflavane-7-O-β-D-glucoside	C23H28O10
118	63	黄芪	3,9-二-O-甲基尼森香豌豆紫檀酚	3,9-di-O-methylnissolin	C18H18O5
119	64	黄芪	9,10-二甲氧基紫檀烷-3-O-β-D-葡萄糖甙	9,10-dimethoxypterocarpan-3-O-β-D-glucoside	C23H26O10
120	65	黄芪	二十二(烷)酸	behenic acid	C22H44O2
121	66	黄芪	乙酰黄芪甙 I	acetylastragaloside I	C47H74O17
122	1	黄芩	3,5,7,2',6'-五羟基黄酮	3,5,7,2',6'-pentahydroxy-flavone	C15H10O7
123	2	黄芩	滇黄芩新素	scuteamoenin	C16H14O6
124	3	黄芩	滇黄芩新甙	scuteamoenoside	C22H24O11
125	4	黄芩	粘毛黄芩素III-2'-O-β-D-吡喃葡萄糖甙	viscidulin III-2'-O-β-D-glucopyranoside	C23H24O13
126	5	黄芩	2-(3-羟基-4-甲氧基苯基)-乙基-1-O-α-L-鼠李糖基(1→3)-β-D-(4-阿魏酰基)-葡萄糖甙	2-(3-hydroxy-4-methoxyphenyl)ethyl-1-O-α-L-rhamnosyl(1→3)-β-D-(4-feruloyl)glucoside	C31H40O15
127	6	黄芩	菜油甾醇	campesterol	C28H48O
128	7	黄芩	黄芩黄酮 II	skullcapflavoneII	C15H10O8
129	8	黄芩	黄芩新素	neobaicalein	C19H18O8
130	9	黄芩	黄芩素-7-O-β-D-吡喃葡萄糖甙	baicalein-7-O-β-D-glucopyranoside	C21H18O11
131	10	黄芩	黄芩素	baicalein	C15H10O5
132	11	黄芩	黄芩甙	baicalin	C21H18O11
133	12	黄芩	豆甾醇	stigmasterol	C29H48O
134	13	黄芩	5-羟基-7,8-二甲氧基黄酮	5-hydroxy-7,8-dimethoxyflavone	C17H14O5
135	14	黄芩	苏荠苧黄酮	moslosooflavone	C17H14O5
136	15	黄芩	圣草素	eriodictyol	C15H12O6
137	16	黄芩	汉黄芩素-5-β-D-葡萄糖甙	wogonin-5-β-D-glucoside	C22H22O10
138	17	黄芩	汉黄芩素	wogonin	C16H12O5
139	18	黄芩	汉黄芩甙	wogonoside	C22H20O11
140	19	黄芩	半枝莲种素	rivularin	C18H16O7
141	20	黄芩	白杨素-6-C-β-葡萄糖甙-8-C-α-L-阿拉伯糖甙	chrysin-6-C-β-glucoside-8-C-α-L-arabinoside	C26H28O13
142	21	黄芩	白杨素-6-C-α-L-阿拉伯糖甙-8-C-β-D-葡萄糖甙	chrysin-6-C-α-L-arabinoside-8-C-β-D-glucoside	C26H28O13
143	22	黄芩	白杨素	chrysin	C15H10O4
144	23	黄芩	5,7,2',6'-四羟基黄酮	5,7,2',6'-tetrahydroxyflavone	C15H10O6
145	24	黄芩	5,7,2',5'-四羟基黄酮	5,7,2',5'-tetrahydroxyflavone	C15H10O6
146	25	黄芩	5,7,2',3'-四羟基黄酮	5,7,2',3'-tetrahydroxyflavone	C15H10O6
147	26	黄芩	(2S)-2',5,6',7-四羟基黄烷酮	(2S)-2',5,6',7-tetrahydroxyflavanone	C15H12O6
148	27	黄芩	(2R,3R)-2',3,5,7-四羟基黄烷酮	(2R,3R)-2',3,5,7-tetrahydroxyflavanone	C15H12O6
149	28	黄芩	2,6,2',4'-四羟基-6'-甲氧基查尔酮	2,6,2',4'-tetrahydroxy-6'-methoxychalcone	C16H14O6
150	29	黄芩	粘毛黄芩素 III	viscidulinIII	C17H14O8
151	30	黄芩	5,7,2',5'-四羟基-8,6'-二甲氧基黄酮	5,7,2',5'-tetrahydroxy-8,6'-dimethoxylavone	C17H14O8
152	31	黄芩	7-甲氧基黄芩素	7-methoxybaicalein	C16H12O5
153	32	黄芩	甘黄芩甙元	ganhuangein	C17H14O8
154	33	黄芩	甘肃黄芩素 I	rehderianinI	C17H14O7
155	34	黄芩	去甲汉黄芩素	rehderianinI	C17H14O7
156	35	黄芩	粘毛黄芩素 I	viscidulinI	C15H10O7
157	36	黄芩	3,5,7,2',6'-五羟基黄烷酮	3,5,7,2',6'-pentahydroxyflavanone	C15H12O7
158	37	黄芩	木蝴蝶素A-7-O-葡萄糖醛酸甙	oroxylin-A-7-O-glucuronide	C22H22O10
159	38	黄芩	木蝴蝶素 A	oroxylin A	C16H12O5
160	39	黄芩	木蝴蝶素	oroxylin	C16H12O5
161	40	黄芩	5,7,2'-三羟基黄酮	5,7,2'-trihydroxyflavone	C15H10O5
162	41	黄芩	(2S)-5,7,8-三羟基黄烷酮	(2S)-5,7,8-trihydroxyflavanone	C15H12O5
163	42	黄芩	(2R,3R)-3,5,7-三羟基黄烷酮	(2R,3R)-3,5,7-trihydroxyflavanone	C15H12O5
164	43	黄芩	5,7,4'-三羟基-8-甲氧基黄酮	5,7,4'-trihydroxy-8-methoxyflavone	C16H12O6
165	44	黄芩	韧黄芩素 II	tenaxinII	C16H12O6
166	45	黄芩	5,7,2'-三羟基-8-甲氧基黄酮	5,7,2'-trihydroxy-8-methoxyflavone	C16H12O6
167	46	黄芩	5,8,2'-三羟基-7-甲氧基黄酮	5,8,2'-trihydroxy-7-methoxyflavone	C16H12O6
168	47	黄芩	5,7,2'-三羟基-6'-甲氧基黄酮	5,7,2'-trihydroxy-6'-methoxyflavone	C16H12O6
169	48	黄芩	5,7,4'-三羟基-6-甲氧基黄烷酮	5,7,4'-trihydroxy-6-methoxyflavanone	C16H12O6
170	49	黄芩	(2S)-7,2',6'-三羟基-5-甲氧基黄烷酮	(2S)-7,2',6'-trihydroxy-5-methoxyflavanone	C16H14O6
171	50	黄芩	5,2',5'-三羟基-6,7,8-三甲氧基黄酮	5,2',5'-trihydroxy-6,7,8-trimethoxyflavone	C18H16O8
172	51	黄芩	5,7,2'-三羟基-8,6'-二甲氧基黄酮	5,7,2'-trihydroxy-8,6'-dimethoxyflavone	C17H14O7
173	52	黄芩	粘毛黄芩素 II	viscidulinII	C17H14O7
174	53	黄芩	5,2',6'-三羟基-7,8-二甲氧基黄酮	5,2',6'-trihydroxy-7,8-dimethoxyflavone	C17H14O7
175	54	黄芩	2',5,8-三羟基-6,7-二甲氧基黄酮	2',5,8-trihydroxy-6,7-dimethoxyflavone	C17H14O7
176	55	黄芩	5,2'-二羟基-6,7,8-三甲氧基黄酮	5,2'-dihydroxy-6,7,8-trimethoxyflavone	C18H16O7
177	56	黄芩	黄芩黄酮 I	panicolin	C17H14O6
178	57	黄芩	5,8-二羟基-6,7-二甲氧基黄酮	5,8-dihydroxy-6,7-dimethoxyflavone	C17H14O6
179	58	黄芩	二氢黄芩甙	dihydrobaicalin	C21H20O11
180	59	黄芩	二氢木蝴蝶素 A	dihydrooroxylin A	C16H14O5
181	1	僵蚕	6-N-羟乙基腺嘌呤	6-N-hydroxy ethyl adenine
182	2	僵蚕	草酸铵	ammonium oxalate
183	3	僵蚕	环(L-丙氨酸-L-脯氨酸)二肽	cyclo(L-Ala-L- Pro)
184	4	僵蚕	白僵菌环缩醇酸肽 Ka	beauverolide Ka	C37H50N4O5
185	5	僵蚕	白僵菌环缩醇酸肽 Ja	beauverolide Ja	C35H46N4O5
186	6	僵蚕	白僵菌环缩醇酸肽 I	beauverolide I	C29H45N3O5
187	7	僵蚕	白僵菌环缩醇酸肽 H	beauverolide H	C27H41N3O5
188	8	僵蚕	白僵菌环缩醇酸肽 Fa	beauverolide Fa	C33H45N3O5
189	9	僵蚕	白僵菌环缩醇酸肽 F	beauverolide F	C33H45N3O5
190	10	僵蚕	白僵菌环缩醇酸肽 Ea	beauverolide Ea	C29H45N3O5
191	11	僵蚕	白僵菌环缩醇酸肽 E	beauverolide E	C29H45N3O5
192	12	僵蚕	白僵菌环缩醇酸肽 D	beauverolide D	C28H43N3O5
193	13	僵蚕	白僵菌环缩醇酸肽 Ca	beauverolide Ca	C35H49N3O5
194	14	僵蚕	白僵菌环缩醇酸肽 C	beauverolide C	C35H49N3O5
195	15	僵蚕	白僵菌环缩醇酸肽 Ba	beauverolide Ba	C31H49N3O5
196	16	僵蚕	白僵菌环缩醇酸肽 B	beauverolide B	C31H49N3O5
197	17	僵蚕	白僵菌环三肽 B	beauverilide B	C33H53N3O5
198	18	僵蚕	硬脂酰胺	stearamide	C18H37NO
199	19	僵蚕	棕榈酰胺	palmitamide	C16H33NO
200	20	僵蚕	棕榈油酸	palmitoleic acid	C16H30O2
201	21	僵蚕	3-羟基犬尿氨酸	3-hydroxy kynurenine	C10H12N2O4
202	22	僵蚕	软白僵菌素	tenellin	C21H23NO5
203	23	僵蚕	环(L-异亮氨酸-L-缬氨酸)二肽	cyclo(L-Ile-L- Val)	C10H18N2O2
204	24	僵蚕	环(L-异亮氨酸-L-异亮氨酸)二肽	cyclo(L-Ile-L- Ile)	C12H22N2O2
205	25	僵蚕	白僵菌黄色素	bassianin	C23H25NO5
206	26	僵蚕	白僵菌素	beauverician	C45H57N3O9
207	27	僵蚕	白僵菌环缩醇酸肽 A	beauverolide A	C30H47N3O5
208	28	僵蚕	白僵菌环四肽	bassianolide	C48H84N4O12
209	29	僵蚕	白僵菌环三肽 A	beauverilide A	C31H49N3O5
210	1	山茱萸	α-姜黄烯( S-)	α-curcumene( S-)	C15H22
211	2	山茱萸	α-姜黄烯( R-)	α-curcumene( R-)	C15H22
212	3	山茱萸	[木来]木鞣质 G	cornusiin G	C75H56O48
213	4	山茱萸	[木来]木鞣质 C	cornusiin C	C102H74O66
214	5	山茱萸	糠醛	furfural	C5H4O2
215	6	山茱萸	缬氨酸	valine	C5H11NO2
216	7	山茱萸	熊果酸	ursolic acid	C30H48O3
217	8	山茱萸	蔗糖	sucrose	C12H22O11
218	9	山茱萸	路边青鞣质 D	gemin D	C27H22O18
219	10	山茱萸	酪氨酸	tyrosine	C9H11NO3
220	11	山茱萸	赖氨酸	lysine	C6H14N2O2
221	12	山茱萸	榄香脂素	elemicin	C12H16O3
222	13	山茱萸	棕榈酸乙酯	ethyl palmitate	C18H36O2
223	14	山茱萸	葡萄糖	glucose	C6H12O6
224	15	山茱萸	维生素 A	vitamin A	C20H30O
225	16	山茱萸	[木来]木鞣质 B	cornusiin B	C48H30O30
226	17	山茱萸	[木来]木鞣质 A	cornusiin A	C68H50O44
227	18	山茱萸	黄樟醚	safrole	C10H10O2
228	19	山茱萸	酒石酸	tartaric acid	C4H6O6
229	20	山茱萸	胱氨酸	cystine	C20H24O7
230	21	山茱萸	桂皮酸苄酯	benzyl cinnamate	C16H14O2
231	22	山茱萸	莫罗忍冬甙	morroniside	C17H26O11
232	23	山茱萸	α-姜黄烯	α-curcumene	C15H22
233	24	山茱萸	亮氨酸	leucine	C6H13NO2
234	25	山茱萸	胡薄荷酮	pulegone	C10H16O
235	26	山茱萸	茴香脑	anethole	C10H12O
236	27	山茱萸	α-古巴烯	α-copaene	C15H24
237	28	山茱萸	组氨酸	histidine	C6H9N3O2
238	29	山茱萸	细辛醚	asaricin	C11H12O3
239	30	山茱萸	油酸乙酯	ethyl oleate	C20H38O2
240	31	山茱萸	果糖	fructose	C6H12O6
241	32	山茱萸	α-松油醇	α-terpineol	C10H18O
242	33	山茱萸	苹果酸	malic acid	C4H6O5
243	34	山茱萸	苯丙氨酸	phenylalanine	C9H11NO2
244	35	山茱萸	β-苯乙醇	β-phenylethyl alcohol	C8H10O
245	36	山茱萸	2-苯乙醇	2-phenylethanol	C8H10O
246	37	山茱萸	谷氨酸	glutamic acid	C5H9NO4
247	38	山茱萸	苏氨酸(羟丁氨酸)	threonine	C4H9NO3
248	39	山茱萸	芳樟醇氧化物	linalool oxide	C10H18O2
249	40	山茱萸	异亮氨酸	isoleucine	C6H13NO2
250	41	山茱萸	异细辛脑	isoasarone	C12H16O3
251	42	山茱萸	菱属鞣质	isoterchebin	C41H30O27
252	43	山茱萸	异戊醇	isoamyl alcohol	C5H12O
253	44	山茱萸	异丁醇	isobutanol	C4H10O
254	45	山茱萸	当药甙	sweroside	C16H22O9
255	46	山茱萸	亚麻酸乙酯	ethyllinolenate	C20H34O2
256	47	山茱萸	亚油酸乙酯	ethyllinoleate	C20H36O2
257	48	山茱萸	亚油酸	linoleic acid	C18H32O2
258	49	山茱萸	丝氨酸	serine	C3H7NO3
259	50	山茱萸	1,2,3,6-四-O-没食子酰-β-D-葡萄糖	1,2,3,6-tetra-O-galloyl-β-D-glucose	C34H28O23
260	51	山茱萸	蛋氨酸	methionine	C5H11NO2S
261	52	山茱萸	7-O-甲基莫罗忍冬甙	7-O-methylmorroniside	C18H28O11
262	53	山茱萸	4-烯丙基藜芦醚	4-allylveratrole	C11H14O2
263	54	山茱萸	甲基丁香油酚	methyleugenol	C11H14O2
264	55	山茱萸	4-甲氧基1,2-苯并间二氧杂环戊烯	4-methoxy-1,2-benzodioxole	C8H8O3
265	56	山茱萸	丙氨酸	alanine	C3H7NO2
266	57	山茱萸	天(门)冬氨酸	asparagic acid	C4H7NO4
267	58	山茱萸	马兜铃酮	aristolone	C15H22O
268	59	山茱萸	马钱子甙	loganin	C17H26O10
269	60	山茱萸	山茱萸鞣质3	cornus-tannin 3	C34H26O22
270	61	山茱萸	山茱萸鞣质2	cornus-tannin 2	C41H30O26
271	62	山茱萸	山茱萸鞣质1	isoterchebin	C41H30O27
272	63	山茱萸	山茱萸裂甙	cornuside	C24H30O14
273	64	山茱萸	1,2,3-三-O-没食子酰-β-D-葡萄糖	1,2,3-tri-O-galloyl-β-D-glucose	C27H24O18
274	65	山茱萸	1,2,6-三-O-没食子酰基-β-D-吡喃葡萄糖甙	1,2,6-tri-O-galloyl-β-D-glucopyranoside	C27H24O18
275	66	山茱萸	丁醇	butanol	C4H10O
276	67	山茱萸	丁香鞣质	eugeniin	C41H30O26
277	68	山茱萸	2,3-二-O-没食子酰-β-D-葡萄糖	2,3-di-O-galloyl-β-D-glucose	C20H20O14
278	69	山茱萸	乙基香草醛	ethylvanillin	C9H12O3
279	1	益母草	益母草碱亚硝酸盐	leonurine nitrite
280	2	益母草	鼬瓣花二萜	galeopsin	C22H32O5
281	3	益母草	益母草碱	leonurine	C14H21N3O5
282	4	益母草	益母草二萜	leoheterin	C20H30O4
283	5	益母草	前益母草二萜	preleoheterin	C20H30O4
284	6	益母草	前西班牙夏罗草酮	prehispanolone	C19H28O3
285	7	益母草	4-胍基-1-丁醇	4-guanidino-1-butanol	C5H13N3O
286	8	益母草	4-胍基-丁酸	4-guanidino-butyric acid	C5H11N3O2
287	9	益母草	细叶益母草萜内酯	leosibiricin	C22H28O7
288	10	益母草	细叶益母草萜	leosibirin	C24H34O8
289	11	益母草	异细叶益母草萜	isoleosibirin	C24H34O8
290	12	益母草	西班牙夏罗草酮	hispanolone	C20H30O3
291	13	益母草	水苏碱	stachydrine	C7H13NO2
292	1	余甘子	油柑酸	phyllemblic acid
293	2	余甘子	余甘子酚	emblicol
294	3	余甘子	鞣(料)云实精	corilagin	C27H22O18
295	4	余甘子	葡萄糖没食子鞣甙	glucogallin	C13H16O10
296	5	余甘子	粘酸	mucic acid	C6H10O8
297	6	余甘子	原诃子酸	terchebin	C41H30O27
298	7	余甘子	诃黎勒酸	chebulagic acid	C41H30O27
299	8	余甘子	诃子酸	chebulinic acid	C41H32O27
300	9	余甘子	诃子次酸	chebulic acid	C14H12O11
301	10	余甘子	没食子酸	gallic acid	C7H6O5
302	11	余甘子	并没食子酸	ellagic acid	C14H6O8
303	12	余甘子	3,6-二没食子酰葡萄糖	3,6-digalloyl glucose	C20H20O14
304		山茱萸	阿魏酸	Ferulic acid	C10H10O4
305		山茱萸	含余甘子酸	Amlaicacid
306		余甘子	丹宁酸	digallic acid	C76H52O46
307		余甘子	异毛蕊花苷	isoverbascoside	C29H36O15
308		黄芪	苯乙酸	phenyl acetic acid	C8H8O2
309		黄芩	9,10-二甲氧基紫檀烷-3-O-β-D-葡萄糖苷	9,10－Dimethoxy-pterocarpane－3－O-β-D-glucoside	C23H26O10
310		黄芪	山奈酚-7-o-β-D-葡萄糖苷	Kaempferol-7-O-β-D- glucoside
311		黄芪	苯乙酸	phenyl acetic acid
312		黄芪	槐花皂苷Ⅰ	kaikasaponinⅠ
313		槐花	芦丁	rutin	C27H30O16
		益母草
314		黄芪	山奈酚	kaempferol	C15H10O6
		余甘子
315		黄芪	山奈酚甲醚-葡萄糖苷	kaempferol - Methyl Ether - glucoside
		益母草

## Sheet: Sheet3
Compound	Origin
Identification	Phyllanthi Fruit
glucogallin	Corni Fructus，Phyllanthi Fruit
Gallic acid	Rehmannia Radix
Rehmannioside D	Rehmannia Radix
Aucuboside	Rehmannia Radix
Rehmannioside A	Corni Fructus
3,5-Dihydroxybenzoic acid	Leonuri Herba
leonuride	Scutellariae Radix
scuteamoenoside	Rehmannia Radix
8-epiloganic acid	Corni Fructus
Morroniside	Phyllanthi Fruit
digallic acid	Phyllanthi Fruit
Amlaicacid	Corni Fructus
1,2,6-tri-O-galloyl-β-D-glucopyranoside	Corni Fructus
Loganin	Corni Fructus
cornus-tannin Ⅲ	Corni Fructus
Sweroside	Scutellariae Radix
skullcapflavoneII	Leonuri Herba
Leonurine	Sophorae Flos/Leonuri Herba
Rutin	Rehmannia Radix
isoverbascoside	Phyllanthi Fruit
ellagic acid	Astragali Radix/Leonuri Herba
Isoquercitrin	Scutellariae Radix
chrysin-6-C-α-L-arabinoside-8-C-β-D-glucoside	Astragali Radix
Ferulic acid	Corni Fructus
CornusideⅠ	Sophorae Flos
Quercetin	Corni Fructus
Cornuside	Astragali Radix
isorhamnetin-3-O-glucoside	Scutellariae Radix
Baicalin	Scutellariae Radix
2-(3-hydroxy-4-methoxyphenyl)ethyl-1-O-α-L-rhamnosyl(1→3)-β-D-(4-feruloyl)glucoside	Rehmannia Radix
phenyl acetic acid	Astragali Radix
Rhamnocitrin	Phyllanthi Fruit
Kaempferol-7-O-β-D- glucoside	Astragali Radix
9,10－Dimethoxy-pterocarpane－3－O-β-D-glucoside	Scutellariae Radix
(2S)-2',5,6',7-tetrahydroxyflavanone	Scutellariae Radix
Wogonoside	Astragali Radix
kaempferol - Methyl Ether - glucoside	Astragali Radix/Phyllanthi Fruit
kaempferol	Astragali Radix/Sophorae Flos
isorhamnetin	Scutellariae Radix
Baicalein	Astragali Radix
astragalosideⅣ	Astragali Radix
formononetin	Astragali Radix
astragalosideⅧ	Astragali Radix/Sophorae Flos
soyasaponin	Astragali Radix
astragalosideⅡ	Scutellariae Radix
Wogonin	Scutellariae Radix
Chrysin	Scutellariae Radix
neobaicaleinⅡ	Sophorae Flos
kaikasaponinⅠ	Astragali Radix
astragalosideⅠ	Astragali Radix
13-hydroxy-9,11-octadecadienoic acid	Corni Fructus
ursolic acid
