# Supplementary material for: Revealing Synergistic Mechanism of Multiple Components in Gandi Capsule for Diabetic Nephropathy Therapeutics by Network Pharmacology
Source: Evid Based Complement Alternat Med. 2018 Apr 26;2018:6503126. doi: 10.1155/2018/6503126 (PMC5944259; doi:10.1155/2018/6503126)
Supplement: Supplementary Materials — Six files have been uploaded as supplementary materials for this research. The first file is the WORD file of the appendix, which has two forms. One is the target protein database, and the other is the form of valid results between the compounds and proteins in docking. The second file is an EXCEL file of the compound database including 315 compounds. The third file is the graphical abstract in PDF, which shows the main process of the research with pictures. The fourth file is a form with three sheets in EXCEL format, which includes total results of docking, valid results of docking, and high affinity results of docking. Meanwhile, the fifth file and the sixth file are EXCEL files of the network diagram of representative target-compound networks and target-compound-pathway networks, respectively. [file 6503126.f1.zip › 6503126.f1/libdockscore of docking.xlsx]

## Sheet: 对接后靶点总览
编号	target name	PDB code	disease	astragalosideⅣ		Morroniside		ferulic acid		rutin		wogonin		kaempferide		ligand
1	Acetyl-CoA carboxylase 1	3COJ	Diabetes mellitus	100.229		126.543		46.7383				93.8182		107.165		90.5333
2	Acetyl-CoA carboxylase 2（乙酰-CoA羧化酶）	3JRX	Diabetes mellitus	162.36		135.974		66.6798		137.501		97.8305		104.002		113.588
3	AMP-activated protein kinase	4RER	Diabetes mellitus			118.702		55.0136		106.526		91.6604		96.4313		142.762
4	Beta-secretase 2 (BACE2)	2EWY	Diabetes mellitus			135.629		58.7846				93.6622		97.4896		165.212
5	Carnitine acyltransferase	1s5o	Diabetes mellitus			118.122		58.0263				89.042		86.1139		62.9424
6	Dipeptidyl peptidase IV	2G63	Diabetes mellitus	151.06		125.422		55.5065		160.657		85.6902		106.226		123
7	Free fatty acid receptor1	4PHU	Diabetes mellitus	65.9737		98.3158		73.9336				96.2661		116.783		161.63
8	Fructosamine oxidase	3DJE	Diabetes mellitus					57.9381				114.108		85.0907		100.214
9	Glucocorticoid receptor	4P6W	Diabetes mellitus			119.783		58.6039				84.8228		97.1514		145.595
10	Glucokinase（Hexokinase D）	4DHY	Diabetes mellitus					75.964								101.548
11	Cytosolic β-Glucosidase	2E9L	Diabetes mellitus					68.419						91.0048		40.7202
12	Insulin-like Growth Factor2	2v5p	Diabetes mellitus			92.4891		46.1357				64.7078				97.4003
13	insulin receptor	4IBM	Diabetes mellitus			121.946		52.1252				87.4264		92.1442		117.266
14	Interleukin-2(IL-2)	1M48	Diabetes mellitus	126.64		103.383		62.7339		96.0068		78.892		89.8972		139.054
15	Ketohexokinase（酮己糖激酶）	3QAI	Diabetes mellitus	147.267		132.091		66.8968		149.847		97.1415		102.142		138.589
16	Leptin receptor	3v6o	Diabetes mellitus													30.7336
17	Maltase-glucoamylase（麦芽糖酶糖化酶）	2QMJ	Diabetes mellitus	124.069		110.239		62.4124				67.3473		78.4625		53.0502
18	Pepsin 3A（PepsinA）	1F34	Diabetes mellitus					65.7352				92.3467		106.415		53.9336
19	Peroxisome proliferator activated receptor delta	3GZ9	Diabetes mellitus	92.719		101.016		48.5297		87.9119		73.5728		82.7219		108.046
20	Phosphodiesterase Type 10 (PDE10A)	3UI7	Diabetes mellitus											102.011		109.371
21	Protein Kinase C, beta Type（PKC-B）	2I0E	Diabetes mellitus			113.553		51.3655		91.2446		88.0759		97.4258		109.53
22	Protein tyrosine phosphatase-1B	1LQF	Diabetes mellitus	127.21		117.973		72.3907				86.8955		85.1252		201.026
23	Pyruvate dehydrogenase kinase isoform 2 (PDHK2)	2BU5	Diabetes mellitus	154.463		124.082		71.6419		124.764		93.987		102.147		113.191
24	Recombinant human angiotensin converting enzyme 2	1R4L	Diabetes mellitus	113.761		101.648		50.5277		100.411		69.7827		74.6327		114.198
25	RXRa（视黄酸受体）	1FM6	Diabetes mellitus	130.447		105.831		52.8218		75.7732		77.5379		94.5362		-24.9156
26	Tumor necrosis factor alpha（肿瘤坏死因子α）	4TWT	Diabetes mellitus	140.38		130.746		53.4364		96.7117		89.0808		101.81		129.82
27	Glucagon-like peptide 1 receptor	3C59	Diabetes mellitus	117.317		113.393		60.2452				76.9067		95.7965		75.4985
28	Vasopressin receptor(avpr2)	4JQI	Diabetes mellitus					51.1809								41.5811
29	CD6	5A2E	Diabetes mellitus type 1			102.238		50.2612				66.4694		82.5974		50.6248
30	Glutamate decarboxylase 2	2OKK	Diabetes mellitus type 1					33.5595								48.6495
31	HLA class II antigen DQ-2 alpha	1UVQ	Diabetes mellitus type 1			61.2856		41.1495								66.6006
32	Protein tyrosine phosphatase	5BZX	Diabetes mellitus type 1					88.2226								93.5106
33	Glucagon receptor	5ee7	Diabetes mellitus type 2	101.234		129.837		69.5017		72.3559		108.795		106.871		77.4428
34	Interleukin-6 receptor	1N26	Diabetes mellitus type 2	100.213		75.7484				108.825				52.2145		111.366
35	PI3K gamma	3L54	Diabetes mellitus type 2			119.986		65.7294				96.7761		102.082		106.29
36	Purinoceptor（嘌呤受体P2Y purinoceptor 1）	4XNV	Diabetes mellitus type 2	82.7257		82.9886		46.3282		60.0648		79.3589		85.2713		68.9713
37	Sirtuin1(去乙酰化酶)	4I5I	Diabetes mellitus type 2			151.069		68.0519				104.604		105.925		106.741
38	Sirtuin2(去乙酰化酶)	5d7p	Diabetes mellitus type 2			146.788		84.7121				103.49		125.865		114.938
39	Stearoyl CoA desaturase-1	4YMK	Diabetes mellitus type 2					59.2918						133.024		163.015
40	Gastric inhibitory polypeptide receptor	2QKH	Diabetes mellitus type 2					41.043								31.8769
41	Estrogen related receptor alpha（雌激素相关受体）	2PJL	Diabetes mellitus type 2			123.235		58.7158				91.9818		92.6012		121.647
42	Fructose-1,6-bisphosphatase1	1FTA	Diabetes mellitus type 2			121.962		67.7439		114.141		103.958		118.547		126.723
43	Fructose-1,6-bisphosphatase2	3IFC	Diabetes mellitus type 2			93.412		62.5216				74.6934		74.2649		98.6807
44	Corticosteroid 11-beta-dehydrogenase, isozyme 1	3BZU	Diabetes mellitus type 2			144.217		73.5715		111.1		101.101		124.59		210.908
45	redox enzyme （Peroxiredoxin 4 ）p66Shc	3TKS	Diabetic nephropathy			134.829		69.9574				88.0082		113.583		98.0696
46	Adenosine A2a receptor	3EML	Diabetic nephropathy			126.168		57.4898				93.9516		101.531		106.4
47	Aldose reductase	1EF3	Diabetic nephropathy					79.144				114.61		105.744		143.379
48	Aldosterone receptor（ALD，Mineralocorticoid receptor）	2AA2	Diabetic nephropathy	76.9998		85.216		36.7392		61.4232		57.0466		85.2808		84.4052
49	Angiotensin-converting enzyme（ACE）	2OC2	Diabetic nephropathy	140.184		109.701		45.6454		98.6061		76.655		97.1026		142.312
50	C-C chemokine receptor type 5(CCR5)	4MBS	Diabetic nephropathy	154.803		124.615		63.5443		120.506		88.0354				81.9938
51	CGMP-specific 3',5'-cyclic phosphodiesterase	1tbf	Diabetic nephropathy	154.391		132.357		61.4627		123.808		96.187		111.428		139.831
52	Cyclooxygenase2（环氧合酶）	5F1A	Diabetic nephropathy	160.525		140.735		75.3506		141.242		110.774				38.0689
53	Fibroblast growth factor 1 （FGF）	4qo3	Diabetic nephropathy	99.4409		115.608		45.0967		61.1299		54.9364		56.2241		65.8995
54	Heat shock protein 70 1A	3atu	Diabetic nephropathy			150.855		73.9036				115.027		120.906		163.496
55	Heat shock protein 70 1B	4j8f	Diabetic nephropathy			148.422		69.7487				124.003		124.46		159.941
56	heparanase（足细胞乙酰肝素酶）	5e9c	Diabetic nephropathy	143.566		126.912		64.5137		122.545		82.2224		91.414		191.481
57	Interstitial collagenase	1cgl	Diabetic nephropathy	161.873		141.154		77.8062		128.195		92.9515		107.386		205.227
58	JAK1(非受体酪氨酸激酶1)	3eyg	Diabetic nephropathy			126.035		55.9754				99.8534		108.362		103.581
59	Kallikrein（激肽释放酶）	1spj（Kallikrein1）	Diabetic nephropathy	123.027		108.786		61.6694		86.5483		88.2672		110.188		95.1073
60	MAP kinase p38	1a9u（α）	Diabetic nephropathy			110.818		54.907		100.354		77.1262		85.3087		131.583
61	Mitogen-activated protein kinase kinase kinase 5	2clq	Diabetic nephropathy			108.767		48.5121		128.081		88.732		91.1073		136.729
62	Neprilysin	1dmt	Diabetic nephropathy											109.557		61.4516
63	Rho-associated protein kinase 1(ROCK1)	2etk	Diabetic nephropathy			113.972		56.0626				80.4755		82.5391		98.5533
64	soluble epoxide hydrolase(可溶性环氧化物水解酶)	1vj5	Diabetic nephropathy			120.018		60.8333				84.5916		101.876		96.5568
65	TGF-beta receptor type I	1py5	Diabetic nephropathy			152.781		73.8507				101.654		116.621		94.2892
66	Tyrosine-protein kinase JAK2	2b7a	Diabetic nephropathy			128.486		55.081				95.9721		103.71		114.096
67	Protein Kinase C,αType（PKC-A）	3IW4	Diabetic nephropathy			122.598		54.4432				92.3756		93.925		127.526
68	A disintegrin and metalloproteinase with thrombospondin motifs 4	2rjp	Microvascular disease			121.067		76.4661				91.4654		120.413		190.348
69	Aminopeptidase N	4fyr	Microvascular disease			97.9778		48.9276				64.9035		65.9316		64.8627
70	Amyloid beta A4 protein	5csz	Microvascular disease	156.256		125.307		54.5627				86.8643		100.21		194.493
71	Cathepsin D（组织蛋白酶）	4obz	Microvascular disease	145.588		116.515		45.6014		122.268		71.902		79.4376		96.5604
72	Copper-transporting ATPase 2	3cjk	Microvascular disease	83.5548		107.506		61.5337		35.8165		81.9426		82.8419		75.436
73	Glycogen synthase kinase-3 beta	1q3d	Microvascular disease	84.9713		105.215		51.2015		111.8		84.4826		95.8905		106.558
74	Hypoxia-inducible factor 1-alpha（HIF-1α）	3hqu	Microvascular disease	125.059		98.6025		52.1128		78.5377		76.7633		74.4368		186.021
75	Integrin beta-7	3v4v	Microvascular disease	113.335		102.406		48.8858		105.704		79.925		79.0646		128.832
76	Protein DJ-1	3cza	Microvascular disease			51.0368										42.6154
77	Interleukin-1 receptor antagonist protein（IL-1受体拮抗蛋白）	1IRA	DN，Microvascular disease	66.1904		90.6471		41.2349		59.2543		68.8547		64.6625		63.1654
78	Malonyl-CoA decarboxylase, mitochondrial	4f0x	DN，Microvascular disease			121.958		71.5558		126.564		92.5244		97.0385		116.455
79	Mammalian target of Rapamycin (Serine/threonine-protein kinase mTORC1)	1fap	DN，Microvascular disease	134.018		112.884		37.0022		113.064		84.6974		81.5902		129.284
80	Superoxide dismutase [Mn]超氧岐化酶	2adp	DN，Microvascular disease			102.44		67.9341				84.1427		73.0139		74.5191
81	Vascular endothelial growth factor A（VEGF-A）	3QTK	DN，Microvascular disease													36.8014

## Sheet: 可对接靶点
NO.	target name	short name of target	PDB code	disease	astragalosideⅣ	morroniside	ferulic acid	rutin	wogonin	kaempferide	ligand
1	Acetyl-CoA carboxylase 1	ACC1	3COJ	DM	100.229↑	126.543↑	46.7383↓		93.8182↑	107.165↑	90.5333
2	Acetyl-CoA carboxylase 2	ACC2	3JRX	DM	162.36↑	135.974↑	66.6798↓	137.501↑	97.8305↓	104.002↓	113.588
3	AMP-activated protein kinase	AMPK	4RER	DM		118.702↓	55.0136↓	106.526↓	91.6604↓	96.4313↓	142.762
4	Beta-secretase 2	BACE2	2EWY	DM		135.629↓	58.7846↓		93.6622↓	97.4896↓	165.212
5	Carnitine acyltransferase	CRAT	1s5o	DM		118.122↑	58.0263↓		89.042↑	86.1139↑	62.9424
6	Cytosolic β-Glucosidase	CBG	2E9L	DM			68.419↑			91.0048↑	40.7202
7	Dipeptidyl peptidase IV	DPP-IV	2G63	DM	151.06↑	125.422↑	55.5065↓	160.657↑	85.6902↓	106.226↓	123
8	Free fatty acid receptor1	FFAR1	4PHU	DM	65.9737↓	98.3158↓	73.9336↓		96.2661↓	116.783↓	161.63
9	Fructosamine oxidase	FAOX	3DJE	DM			57.9381↓		114.108↑	85.0907↓	100.214
10	Glucagon-like peptide 1 receptor	GLPR-1	3C59	DM	117.317↑	113.393↑	60.2452↓		76.9067↑	95.7965↑	75.4985
11	Glucocorticoid receptor	GR	4P6W	DM		119.783↓	58.6039↓		84.8228↓	97.1514↓	145.595
12	Glucokinase	GK	4DHY	DM			75.964↓				101.548
13	Insulin-like Growth Factor2	IGF2	2v5p	DM		92.4891↓	46.1357↓		64.7078↓		97.4003
14	insulin receptor	IR	4IBM	DM		121.946↑	52.1252↓		87.4264↓	92.1442↓	117.266
15	Interleukin-2	IL-2	1M48	DM	126.64↓	103.383↓	62.7339↓	96.0068↓	78.892↓	89.8972↓	139.054
16	Ketohexokinase	KHK	3QAI	DM	147.267↑	132.091↓	66.8968↓	149.847↑	97.1415↓	102.142↓	138.589
17	Maltase-glucoamylase	MGAM	2QMJ	DM	124.069↑	110.239↑	62.4124↑		67.3473↑	78.4625↑	53.0502
18	Pepsin 3A	Pepsin 3A	1F34	DM			65.7352↑		92.3467↑	106.415↑	53.9336
19	Peroxisome proliferator activated receptor delta	PPAR-delta	3GZ9	DM	92.719↓	101.016↓	48.5297↓	87.9119↓	73.5728↓	82.7219↓	108.046
20	Phosphodiesterase Type 10	PDE10	3UI7	DM						102.011↓	109.371
21	Protein Kinase C, beta Type	PKC-B	2I0E	DM		113.553↑	51.3655↓	91.2446↓	88.0759↓	97.4258↓	109.53
22	Protein tyrosine phosphatase-1B	PTP-1B	1LQF	DM	127.21↓	117.973↓	72.3907↓		86.8955↓	85.1252↓	201.026
23	Pyruvate dehydrogenase kinase isoform 2	PDHK2	2BU5	DM	154.463↑	124.082↑	71.6419↓	124.764↑	93.987↓	102.147↓	113.191
24	Recombinant human angiotensin converting enzyme 2	ACE2	1R4L	DM	113.761↓	101.648↓	50.5277↓	100.411↓	69.7827↓	74.6327↓	114.198
25	RXRa	RXRa	1FM6	DM	130.447↑	105.831↑	52.8218↑	75.7732↑	77.5379↑	94.5362↑	-24.9156
26	Tumor necrosis factor alpha	TNF-α	4TWT	DM	140.38↑	130.746↑	53.4364↓	96.7117↓	89.0808↓	101.81↓	129.82
27	Vasopressin receptor	V2R	4JQI	DM			51.1809↑				41.5811
28	CD6	CD6	5A2E	DM1		102.238↑	50.2612↓		66.4694↑	82.5974↑	50.6248
29	Glutamate decarboxylase 2	GAD2	2OKK	DM1			33.5595↓				48.6495
30	HLA class II antigen DQ-2 alpha	DC-α	1UVQ	DM1		61.2856↓	41.1495↓				66.6006
31	Protein tyrosine phosphatase	PTP	5BZX	DM1			88.2226↓				93.5106
32	Corticosteroid 11-beta-dehydrogenase, isozyme 1	11-DH	3BZU	DM2		144.217↓	73.5715↓	111.1↓	101.101↓	124.59↓	210.908
33	Estrogen related receptor alpha	ERR-α	2PJL	DM2		123.235↑	58.7158↓		91.9818↓	92.6012↓	121.647
34	Fructose-1,6-bisphosphatase1	FBP1	1FTA	DM2		121.962↓	67.7439↓	114.141↓	103.958↓	118.547↓	126.723
35	Fructose-1,6-bisphosphatase2	FBP2	3IFC	DM2		93.412↓	62.5216↓		74.6934↓	74.2649↓	98.6807
36	Gastric inhibitory polypeptide receptor	GIPR	2QKH	DM2			41.043↑				31.8769
37	Glucagon receptor	GCGR	5ee7	DM2	101.234↑	129.837↑	69.5017↓	72.3559↓	108.795↑	106.871↑	77.4428
38	Interleukin-6 receptor	IL-6R	1N26	DM2	100.213↓	75.7484↓		108.825↓		52.2145↓	111.366
39	PI3K gamma	PI3K	3L54	DM2		119.986↑	65.7294↓		96.7761↓	102.082↓	106.29
40	Purinoceptor	P2Y	4XNV	DM2	82.7257↑	82.9886↑	46.3282↓	60.0648↓	79.3589↑	85.2713↑	68.9713
41	Sirtuin1	SIRT1	4I5I	DM2		151.069↑	68.0519↓		104.604↓	105.925↓	106.741
42	Sirtuin2	SIRT2	5d7p	DM2		146.788↑	84.7121↓		103.49↓	125.865↑	114.938
43	Stearoyl CoA desaturase-1	SCD-1	4YMK	DM2			59.2918↓			133.024↓	163.015
44	Adenosine A2a receptor	ADORA2A	3EML	DN		126.168↑	57.4898↓		93.9516↓	101.531↓	106.4
45	Aldose reductase	AR	1EF3	DN			79.144↓		114.61↓	105.744↓	143.379
46	Aldosterone receptor	ALD	2AA2	DN	76.9998↓	85.216↑	36.7392↓	61.4232↓	57.0466↓	85.2808↑	84.4052
47	Angiotensin-converting enzyme	ACE	2OC2	DN	140.184↓	109.701↓	45.6454↓	98.6061↓	76.655↓	97.1026↓	142.312
48	C-C chemokine receptor type 5	CCR5	4MBS	DN	154.803↑	124.615↑	63.5443↓	120.506↑	88.0354↑		81.9938
49	CGMP-specific 3',5'-cyclic phosphodiesterase	CGB-PDE	1tbf	DN	154.391↑	132.357↓	61.4627↓	123.808↓	96.187↓	111.428↓	139.831
50	Cyclooxygenase2	COX2	5F1A	DN	160.525↑	140.735↑	75.3506↑	141.242↑	110.774↑		38.0689
51	Fibroblast growth factor 1	FGF	4qo3	DN	99.4409↑	115.608↑	45.0967↓	61.1299↓	54.9364↓	56.2241↓	65.8995
52	Heat shock protein 70 1A	HSF1A	3atu	DN		150.855↓	73.9036↓		115.027↓	120.906↓	163.496
53	Heat shock protein 70 1B	HSF1B	4j8f	DN		148.422↓	69.7487↓		124.003↓	124.46↓	159.941
54	heparanase	HEP	5e9c	DN	143.566↓	126.912↓	64.5137↓	122.545↓	82.2224↓	91.414↓	191.481
55	Interstitial collagenase	MMP-1	1cgl	DN	161.873↓	141.154↓	77.8062↓	128.195↓	92.9515↓	107.386↓	205.227
56	JAK1	JAK1	3eyg	DN		126.035↑	55.9754↓		99.8534↓	108.362↑	103.581
57	Kallikrein	KLK1	1spj	DN	123.027↑	108.786↑	61.6694↓	86.5483↓	88.2672↓	110.188↑	95.1073
58	MAP kinase p38	MAPK12	1a9u	DN		110.818↓	54.907↓	100.354↓	77.1262↓	85.3087↓	131.583
59	Mitogen-activated protein kinase kinase kinase 5	MAP3K5	2clq	DN		108.767↓	48.5121↓	128.081↓	88.732↓	91.1073↓	136.729
60	Neprilysin	NEP	1dmt	DN						109.557↑	61.4516
61	Protein Kinase C,αType	PKC-A	3IW4	DN		122.598↓	54.4432↓		92.3756↓	93.925↓	127.526
62	Peroxiredoxin 4	PRDX4	3TKS	DN		134.829↑	69.9574↓		88.0082↓	113.583↑	98.0696
63	Rho-associated protein kinase 1	ROCK1	2etk	DN		113.972↑	56.0626↓		80.4755↓	82.5391↓	98.5533
64	soluble epoxide hydrolase	SEH	1vj5	DN		120.018↑	60.8333↓		84.5916↓	101.876↑	96.5568
65	TGF-beta receptor type I	TGFR-1	1py5	DN		152.781↑	73.8507↓		101.654↑	116.621↑	94.2892
66	Tyrosine-protein kinase	JAK2	2b7a	DN		128.486↑	55.081↓		95.9721↓	103.71↓	114.096
67	A disintegrin and metalloproteinase with thrombospondin motifs 4	ADAMTS-5	2rjp	MD		121.067↓	76.4661↓		91.4654↓	120.413↓	190.348
68	Aminopeptidase N	HAPN	4fyr	MD		97.9778↑	48.9276↓		64.9035↑	65.9316↑	64.8627
69	Amyloid beta A4 protein	ABPP	5csz	MD	156.256↓	125.307↓	54.5627↓		86.8643↓	100.21↓	194.493
70	Cathepsin D	CD	4obz	MD	145.588↑	116.515↑	45.6014↓	122.268↑	71.902↓	79.4376↓	96.5604
71	Copper-transporting ATPase 2	CT2	3cjk	MD	83.5548↑	107.506↑	61.5337↓	35.8165↓	81.9426↑	82.8419↑	75.436
72	Glycogen synthase kinase-3 beta	GSK-3 beta	1q3d	MD	84.9713↓	105.215↓	51.2015↓	111.8↑	84.4826↓	95.8905↓	106.558
73	Hypoxia-inducible factor 1-alpha	HIF-1α	3hqu	MD	125.059↓	98.6025↓	52.1128↓	78.5377↓	76.7633↓	74.4368↓	186.021
74	Integrin beta-7	ITGB7	3v4v	MD	113.335↓	102.406↓	48.8858↓	105.704↓	79.925↓	79.0646↓	128.832
75	Protein DJ-1	PDJ-1	3cza	MD		51.0368↑					42.6154
76	Interleukin-1 receptor antagonist protein	IL1RN	1IRA	DN，MD	66.1904↑	90.6471↑	41.2349↓	59.2543↓	68.8547↑	64.6625↑	63.1654
77	Malonyl-CoA decarboxylase, mitochondrial	MLYCD	4f0x	DN，MD		121.958↑	71.5558↓	126.564↑	92.5244↓	97.0385↓	116.455
78	Mammalian target of Rapamycin	mTOR	1fap	DN，MD	134.018↑	112.884↓	37.0022↓	113.064↓	84.6974↓	81.5902↓	129.284
79	Superoxide dismutase [Mn]	SOD2	2adp	DN，MD		102.44↑	67.9341↓		84.1427↓	73.0139↓	74.5191

## Sheet: 高亲和力靶点
编号	target name	short name of target	PDB code	disease	astragalosideⅣ		Morroniside		ferulic acid		rutin		wogonin		kaempferide		ligand
1	Acetyl-CoA carboxylase 1	ACC1	3COJ	Diabetes mellitus	100.229	高	126.543	高	46.7383	低			93.8182	高	107.165	高	90.5333
2	Acetyl-CoA carboxylase 2（乙酰-CoA羧化酶）	ACC2	3JRX	Diabetes mellitus	162.36	高	135.974	高	66.6798	低	137.501	高	97.8305	低	104.002	低	113.588
3	Carnitine acyltransferase	CRAT	1s5o	Diabetes mellitus			118.122	高	58.0263	低			89.042	高	86.1139	高	62.9424
4	Cytosolic β-Glucosidase	CBG	2E9L	Diabetes mellitus					68.419	高					91.0048	高	40.7202
5	Dipeptidyl peptidase IV	DPP-IV	2G63	Diabetes mellitus	151.06	高	125.422	高	55.5065	低	160.657	高	85.6902	低	106.226	低	123
6	Fructosamine oxidase	FAOX	3DJE	Diabetes mellitus					57.9381	低			114.108	高	85.0907	低	100.214
7	Glucagon-like peptide 1 receptor	GLPR-1	3C59	Diabetes mellitus	117.317	高	113.393	高	60.2452	低			76.9067	高	95.7965	高	75.4985
8	insulin receptor	IR	4IBM	Diabetes mellitus			121.946	高	52.1252	低			87.4264	低	92.1442	低	117.266
9	Ketohexokinase（酮己糖激酶）	KHK	3QAI	Diabetes mellitus	147.267	高	132.091	低	66.8968	低	149.847	高	97.1415	低	102.142	低	138.589
10	Maltase-glucoamylase（麦芽糖酶糖化酶）	MGAM	2QMJ	Diabetes mellitus	124.069	高	110.239	高	62.4124	高			67.3473	高	78.4625	高	53.0502
11	Pepsin 3A（PepsinA）	Pepsin 3A	1F34	Diabetes mellitus					65.7352	高			92.3467	高	106.415	高	53.9336
12	Protein Kinase C, beta Type（PKC-B）	PKC-B	2I0E	Diabetes mellitus			113.553	高	51.3655	低	91.2446	低	88.0759	低	97.4258	低	109.53
13	Pyruvate dehydrogenase kinase isoform 2 (PDHK2)	PDHK2	2BU5	Diabetes mellitus	154.463	高	124.082	高	71.6419	低	124.764	高	93.987	低	102.147	低	113.191
14	RXRa（视黄酸受体）	RXRa	1FM6	Diabetes mellitus	130.447	高	105.831	高	52.8218	高	75.7732	高	77.5379	高	94.5362	高	-24.9156
15	Tumor necrosis factor alpha（肿瘤坏死因子α）	TNF-α	4TWT	Diabetes mellitus	140.38	高	130.746	高	53.4364	低	96.7117	低	89.0808	低	101.81	低	129.82
16	Vasopressin receptor(avpr2)	V2R	4JQI	Diabetes mellitus					51.1809	高							41.5811
17	CD6	CD6	5A2E	Diabetes mellitus type 1			102.238	高	50.2612	低			66.4694	高	82.5974	高	50.6248
18	Estrogen related receptor alpha（雌激素相关受体）	ERR-α	2PJL	Diabetes mellitus type 2			123.235	高	58.7158	低			91.9818	低	92.6012	低	121.647
19	Gastric inhibitory polypeptide receptor	GIPR	2QKH	Diabetes mellitus type 2					41.043	高							31.8769
20	Glucagon receptor	GCGR	5ee7	Diabetes mellitus type 2	101.234	高	129.837	高	69.5017	低	72.3559	低	108.795	高	106.871	高	77.4428
21	PI3K gamma	PI3K	3L54	Diabetes mellitus type 2			119.986	高	65.7294	低			96.7761	低	102.082	低	106.29
22	Purinoceptor（嘌呤受体P2Y purinoceptor 1）	P2Y	4XNV	Diabetes mellitus type 2	82.7257	高	82.9886	高	46.3282	低	60.0648	低	79.3589	高	85.2713	高	68.9713
23	Sirtuin1(去乙酰化酶)	SIRT1	4I5I	Diabetes mellitus type 2			151.069	高	68.0519	低			104.604	低	105.925	低	106.741
24	Sirtuin2(去乙酰化酶)	SIRT2	5d7p	Diabetes mellitus type 2			146.788	高	84.7121	低			103.49	低	125.865	高	114.938
25	Adenosine A2a receptor	ADORA2A	3EML	Diabetic nephropathy			126.168	高	57.4898	低			93.9516	低	101.531	低	106.4
26	Aldosterone receptor（ALD，Mineralocorticoid receptor）	ALD	2AA2	Diabetic nephropathy	76.9998	低	85.216	高	36.7392	低	61.4232	低	57.0466	低	85.2808	高	84.4052
27	C-C chemokine receptor type 5(CCR5)	CCR5	4MBS	Diabetic nephropathy	154.803	高	124.615	高	63.5443	低	120.506	高	88.0354	高			81.9938
28	CGMP-specific 3',5'-cyclic phosphodiesterase	CGB-PDE	1tbf	Diabetic nephropathy	154.391	高	132.357	低	61.4627	低	123.808	低	96.187	低	111.428	低	139.831
29	Cyclooxygenase2（环氧合酶）	COX2	5F1A	Diabetic nephropathy	160.525	高	140.735	高	75.3506	高	141.242	高	110.774	高			38.0689
30	Fibroblast growth factor 1 （FGF）	FGF	4qo3	Diabetic nephropathy	99.4409	高	115.608	高	45.0967	低	61.1299	低	54.9364	低	56.2241	低	65.8995
31	JAK1(非受体酪氨酸激酶1)	JAK1	3eyg	Diabetic nephropathy			126.035	高	55.9754	低			99.8534	低	108.362	高	103.581
32	Kallikrein（激肽释放酶）	KLK1	1spj（Kallikrein1）	Diabetic nephropathy	123.027	高	108.786	高	61.6694	低	86.5483	低	88.2672	低	110.188	高	95.1073
33	Neprilysin	NEP	1dmt	Diabetic nephropathy											109.557	高	61.4516
34	redox enzyme （Peroxiredoxin 4 ）p66Shc	PRDX4	3TKS	Diabetic nephropathy			134.829	高	69.9574	低			88.0082	低	113.583	高	98.0696
35	Rho-associated protein kinase 1(ROCK1)	ROCK1	2etk	Diabetic nephropathy			113.972	高	56.0626	低			80.4755	低	82.5391	低	98.5533
36	soluble epoxide hydrolase(可溶性环氧化物水解酶)	SEH	1vj5	Diabetic nephropathy			120.018	高	60.8333	低			84.5916	低	101.876	高	96.5568
37	TGF-beta receptor type I	TGFR-1	1py5	Diabetic nephropathy			152.781	高	73.8507	低			101.654	高	116.621	高	94.2892
38	Tyrosine-protein kinase	JAK2	2b7a	Diabetic nephropathy			128.486	高	55.081	低			95.9721	低	103.71	低	114.096
39	Aminopeptidase N	HAPN	4fyr	Microvascular disease			97.9778	高	48.9276	低			64.9035	高	65.9316	高	64.8627
40	Cathepsin D（组织蛋白酶）	CD	4obz	Microvascular disease	145.588	高	116.515	高	45.6014	低	122.268	高	71.902	低	79.4376	低	96.5604
41	Copper-transporting ATPase 2	CT2	3cjk	Microvascular disease	83.5548	高	107.506	高	61.5337	低	35.8165	低	81.9426	高	82.8419	高	75.436
42	Glycogen synthase kinase-3 beta	GSK-3 beta	1q3d	Microvascular disease	84.9713	低	105.215	低	51.2015	低	111.8	高	84.4826	低	95.8905	低	106.558
43	Protein DJ-1	PDJ-1	3cza	Microvascular disease			51.0368	高									42.6154
44	Interleukin-1 receptor antagonist protein（IL-1受体拮抗蛋白）	IL1RN	1IRA	DN，Microvascular disease	66.1904	高	90.6471	高	41.2349	低	59.2543	低	68.8547	高	64.6625	高	63.1654
45	Malonyl-CoA decarboxylase, mitochondrial	MLYCD	4f0x	DN，Microvascular disease			121.958	高	71.5558	低	126.564	高	92.5244	低	97.0385	低	116.455
46	Mammalian target of Rapamycin (Serine/threonine-protein kinase mTORC1)	mTOR	1fap	DN，Microvascular disease	134.018	高	112.884	低	37.0022	低	113.064	低	84.6974	低	81.5902	低	129.284
47	Superoxide dismutase [Mn]超氧岐化酶	SOD2	2adp	DN，Microvascular disease			102.44	高	67.9341	低			84.1427	高	73.0139	低	74.5191
