# Supplementary material for: Revealing Synergistic Mechanism of Multiple Components in Gandi Capsule for Diabetic Nephropathy Therapeutics by Network Pharmacology
Source: Evid Based Complement Alternat Med. 2018 Apr 26;2018:6503126. doi: 10.1155/2018/6503126 (PMC5944259; doi:10.1155/2018/6503126)
Supplement: Supplementary Materials — Six files have been uploaded as supplementary materials for this research. The first file is the WORD file of the appendix, which has two forms. One is the target protein database, and the other is the form of valid results between the compounds and proteins in docking. The second file is an EXCEL file of the compound database including 315 compounds. The third file is the graphical abstract in PDF, which shows the main process of the research with pictures. The fourth file is a form with three sheets in EXCEL format, which includes total results of docking, valid results of docking, and high affinity results of docking. Meanwhile, the fifth file and the sixth file are EXCEL files of the network diagram of representative target-compound networks and target-compound-pathway networks, respectively. [file 6503126.f1.zip › 6503126.f1/representative target-compound.csv]

short name of target	pathway
ACC1	AMPK signaling pathway
ACC2	AMPK signaling pathway
IR	AMPK signaling pathway
GCGR	AMPK signaling pathway
GCGR	AMPK signaling pathway
PI3K	AMPK signaling pathway
SIRT1	AMPK signaling pathway
MLYCD	AMPK signaling pathway
mTOR	AMPK signaling pathway
ACC1	insulin related signaling pathway
GLPR-1	insulin related signaling pathway
IR	insulin related signaling pathway
PKC-B	insulin related signaling pathway
PI3K	insulin related signaling pathway
GSK-3 beta	insulin related signaling pathway
mTOR	insulin related signaling pathway
mTOR	insulin related signaling pathway
ACC1	metabolism of lipid
ACC2	metabolism of lipid
CRAT	metabolism of lipid
IR	metabolism of lipid
RXRa	metabolism of lipid
COX2	metabolism of lipid
JAK2	metabolism of lipid
mTOR	metabolism of lipid
ACC2	TGF-¦Â related pathway
DPP-IV	TGF-¦Â related pathway
TNF-¦Á	TGF-¦Â related pathway
CGB-PDE	TGF-¦Â related pathway
FGF	TGF-¦Â related pathway
ROCK1	TGF-¦Â related pathway
TGFR-1	TGF-¦Â related pathway
CT2	TGF-¦Â related pathway
SOD2	TGF-¦Â related pathway
PKC-B	TNF related pathway
TNF-¦Á	TNF related pathway
COX2	TNF related pathway
COX2	TNF related pathway
TGFR-1	TNF related pathway
CT2	TNF related pathway
SOD2	TNF related pathway
