# Supplementary material for: Revealing Synergistic Mechanism of Multiple Components in Gandi Capsule for Diabetic Nephropathy Therapeutics by Network Pharmacology
Source: Evid Based Complement Alternat Med. 2018 Apr 26;2018:6503126. doi: 10.1155/2018/6503126 (PMC5944259; doi:10.1155/2018/6503126)
Supplement: Supplementary Materials — Six files have been uploaded as supplementary materials for this research. The first file is the WORD file of the appendix, which has two forms. One is the target protein database, and the other is the form of valid results between the compounds and proteins in docking. The second file is an EXCEL file of the compound database including 315 compounds. The third file is the graphical abstract in PDF, which shows the main process of the research with pictures. The fourth file is a form with three sheets in EXCEL format, which includes total results of docking, valid results of docking, and high affinity results of docking. Meanwhile, the fifth file and the sixth file are EXCEL files of the network diagram of representative target-compound networks and target-compound-pathway networks, respectively. [file 6503126.f1.zip › 6503126.f1/target-compound-pathway network.csv]

NO.		short name of target	pathway	disease	character of pathway
1	1	ACC1	metabolism of lipid	Diabetes mellitus	metabolism related
2		ACC1	pyruvate metabolism pathway	Diabetes mellitus	metabolism related
3		ACC1	propanoate metabolism	Diabetes mellitus	metabolism related
4		ACC1	AMPK signaling pathway	Diabetes mellitus	multi-pathway related
5		ACC1	insulin related signaling pathway	Diabetes mellitus	metabolism related
6	2	ACC2	TGF-¦Â related pathway	Diabetes mellitus	immune related
7		ACC2	AMPK signaling pathway	Diabetes mellitus	multi-pathway related
8		ACC2	pyruvate metabolism pathway	Diabetes mellitus	metabolism related
9		ACC2	propanoate metabolism	Diabetes mellitus	metabolism related
10		ACC2	metabolism of lipid	Diabetes mellitus	metabolism related
11	3	CRAT	metabolism of lipid	Diabetes mellitus	metabolism related
12		CRAT	PPAR signaling pathway	Diabetes mellitus	metabolism related
13	4	CBG	metabolism of carbohydrates	Diabetes mellitus	metabolism related
14	5	DPP-IV	IL related signaling pathway	Diabetes mellitus	immune related
15		DPP-IV	TGF-¦Â related pathway	Diabetes mellitus	immune related
16		DPP-IV	protein digestion and absorption	Diabetes mellitus	metabolism related
17	6	GLPR-1	insulin related signaling pathway	Diabetes mellitus	metabolism related
18		GLPR-1	cAMP signaling pathway	Diabetes mellitus	multi-pathway related
19	7	IR	Ras signaling pathway	Diabetes mellitus	apoptosis related
20		IR	Rap1 signaling pathway	Diabetes mellitus	apoptosis related
21		IR	HIF-1 signaling pathway	Diabetes mellitus	apoptosis related
22		IR	foxO signaling pathway	Diabetes mellitus	apoptosis related
23		IR	phospholipase D signaling pathway	Diabetes mellitus	immune related
24		IR	mTOR signaling pathway	Diabetes mellitus	apoptosis related
25		IR	PI3K-Akt signaling pathway	Diabetes mellitus	apoptosis related
26		IR	AMPK signaling pathway	Diabetes mellitus	multi-pathway related
27		IR	insulin related signaling pathway	Diabetes mellitus	metabolism related
28		IR	metabolism of lipid	Diabetes mellitus	metabolism related
29		IR	RAAS pathway	Diabetes mellitus	cardiovascular system related
30	8	KHK	metabolism of carbohydrates	Diabetes mellitus	metabolism related
31	9	MGAM	metabolism of carbohydrates	Diabetes mellitus	metabolism related
32	10	Pepsin 3A	metabolism of carbohydrates	Diabetes mellitus	metabolism related
33	11	PKC-B	Ras signaling pathway	Diabetes mellitus	apoptosis related
34		PKC-B	Rap1 signaling pathway	Diabetes mellitus	apoptosis related
35		PKC-B	calcium signaling pathway	Diabetes mellitus	multi-pathway related
36		PKC-B	chemokine signaling pathway	Diabetes mellitus	immune related
37		PKC-B	TNF related pathway	Diabetes mellitus	immune related
38		PKC-B	HIF-1 signaling pathway	Diabetes mellitus	apoptosis related
39		PKC-B	phosphatidylinositol signaling system	Diabetes mellitus	immune related
40		PKC-B	mTOR signaling pathway	Diabetes mellitus	apoptosis related
41		PKC-B	Wnt signaling pathway	Diabetes mellitus	apoptosis related
42		PKC-B	VEGF signaling pathway	Diabetes mellitus	cardiovascular system related
43		PKC-B	insulin related signaling pathway	Diabetes mellitus	metabolism related
44		PKC-B	RAAS pathway	Diabetes mellitus	cardiovascular system related
45		PKC-B	AGE-RAGE signaling pathway	Diabetes mellitus	metabolism related
46		PKC-B	metabolism of carbohydrates	Diabetes mellitus	metabolism related
47	12	PDHK2	pyruvate metabolism pathway	Diabetes mellitus	metabolism related
48		PDHK2	HIF-1 signaling pathway	Diabetes mellitus	apoptosis related
49	13	RXRa	metabolism of lipid	Diabetes mellitus	metabolism related
50		RXRa	pyruvate metabolism pathway	Diabetes mellitus	metabolism related
51	14	TNF-¦Á	TGF-¦Â related pathway	Diabetes mellitus	immune related
52		TNF-¦Á	TNF related pathway	Diabetes mellitus	immune related
53	15	V2R	phospholipase D signaling pathway	Diabetes mellitus	immune related
54		V2R	RAAS pathway	Diabetes mellitus	cardiovascular system related
55	16	CD6	cell adhesion molecules	Diabetes mellitus type 1	immune related
56	17	ERR-¦Á	PPAR signaling pathway	Diabetes mellitus type 2	metabolism related
57	18	GIPR	cAMP signaling pathway	Diabetes mellitus type 2	multi-pathway related
58		GIPR	glucagon signaling pathway	Diabetes mellitus type 2	metabolism related
59	19	GCGR	glucagon signaling pathway	Diabetes mellitus type 2	metabolism related
60		GCGR	AMPK signaling pathway	Diabetes mellitus type 2	multi-pathway related
61		GCGR	AMPK signaling pathway	Diabetes mellitus type 2	multi-pathway related
62	20	PI3K	AMPK signaling pathway	Diabetes mellitus type 2	multi-pathway related
63		PI3K	insulin related signaling pathway	Diabetes mellitus type 2	metabolism related
64		PI3K	IL related signaling pathway	Diabetes mellitus type 2	immune related
65		PI3K	PI3K-Akt signaling pathway	Diabetes mellitus type 2	apoptosis related
66	21	P2Y1	calcium signaling pathway	Diabetes mellitus type 2	multi-pathway related
67		P2Y1	platelet activation	Diabetes mellitus type 2	cardiovascular system related
68		P2Y1	Rap1 signaling pathway	Diabetes mellitus type 2	apoptosis related
69	22	SIRT1	AMPK signaling pathway	Diabetes mellitus type 2	multi-pathway related
70		SIRT1	foxO signaling pathway	Diabetes mellitus type 2	apoptosis related
71		SIRT1	glucagon signaling pathway	Diabetes mellitus type 2	metabolism related
72	23	ADORA2A	calcium signaling pathway	Diabetic nephropathy	multi-pathway related
73		ADORA2A	cAMP signaling pathway	Diabetic nephropathy	multi-pathway related
74		ADORA2A	Rap1 signaling pathway	Diabetic nephropathy	apoptosis related
75	24	ALD	RAAS pathway	Diabetic nephropathy	cardiovascular system related
76	25	CCR5	chemokine signaling pathway	Diabetic nephropathy	immune related
77		CCR5	cytokine-cytokine receptor interaction	Diabetic nephropathy	immune related
78	26	CGB-PDE ?	TGF-¦Â related pathway	Diabetic nephropathy	immune related
79	27	COX2	arachidonic acid metabolism	Diabetic nephropathy	metabolism related
80		COX2	TNF related pathway	Diabetic nephropathy	immune related
81		COX2	VEGF signaling pathway	Diabetic nephropathy	cardiovascular system related
82		COX2	TNF related pathway	Diabetic nephropathy	immune related
83		COX2	metabolism of lipid	Diabetic nephropathy	metabolism related
84	28	FGF	TGF-¦Â related pathway	Diabetic nephropathy	immune related
85		FGF	Ras signaling pathway	Diabetic nephropathy	apoptosis related
86		FGF	Rap1 signaling pathway	Diabetic nephropathy	apoptosis related
87		FGF	PI3K-Akt signaling pathway	Diabetic nephropathy	apoptosis related
88	29	JAK1	PI3K-Akt signaling pathway	Diabetic nephropathy	apoptosis related
89		JAK1	JAK-STAT signaling pathway	Diabetic nephropathy	multi-pathway related
90		JAK1	IL related signaling pathway	Diabetic nephropathy	immune related
91	30	KLK1	platelet activation	Diabetic nephropathy	cardiovascular system related
92	31	NEP	protein digestion and absorption	Diabetic nephropathy	metabolism related
93		NEP	RAAS pathway	Diabetic nephropathy	cardiovascular system related
94	32	PRDX4	apoptosis	Diabetic nephropathy	apoptosis related
95	33	ROCK1	cAMP signaling pathway	Diabetic nephropathy	multi-pathway related
96		ROCK1	JAK-STAT signaling pathway	Diabetic nephropathy	multi-pathway related
97		ROCK1	chemokine signaling pathway	Diabetic nephropathy	immune related
98		ROCK1	TGF-¦Â related pathway	Diabetic nephropathy	immune related
99		ROCK1	apoptosis	Diabetic nephropathy	apoptosis related
100		ROCK1	JAK-STAT signaling pathway	Diabetic nephropathy	multi-pathway related
101		ROCK1	platelet activation	Diabetic nephropathy	cardiovascular system related
102		ROCK1	AGE-RAGE signaling pathway	Diabetic nephropathy	metabolism related
103	34	SHE	COX signaling pathway	Diabetic nephropathy	immune related
104		SHE	arachidonic acid metabolism	Diabetic nephropathy	metabolism related
105	35	TGFR-1	foxO signaling pathway	Diabetic nephropathy	apoptosis related
106		TGFR-1	hippo signaling pathway	Diabetic nephropathy	apoptosis related
107		TGFR-1	TNF related pathway	Diabetic nephropathy	immune related
108		TGFR-1	TGF-¦Â related pathway	Diabetic nephropathy	immune related
109		TGFR-1	cytokine-cytokine receptor interaction	Diabetic nephropathy	immune related
110		TGFR-1	AGE-RAGE signaling pathway	Diabetic nephropathy	metabolism related
111	36	JAK2	metabolism of lipid	Diabetic nephropathy	metabolism related
112		JAK2	JAK-STAT signaling pathway	Diabetic nephropathy	multi-pathway related
113		JAK2	PI3K-Akt signaling pathway	Diabetic nephropathy	apoptosis related
114	37	HAPN	glutathione Metabolism	Microvascular disease	metabolism related
115	38	CD	IL related signaling pathway	Microvascular disease	immune related
116		CD	collagen degradation	Microvascular disease	metabolism related
117	39	CT2	TGF-¦Â related pathway	Microvascular disease	immune related
118		CT2	TNF related pathway	Microvascular disease	immune related
119	40	GSK-3 beta	chemokine signaling pathway	Microvascular disease	immune related
120		GSK-3 beta	hippo signaling pathway	Microvascular disease	apoptosis related
121		GSK-3 beta	insulin related signaling pathway	Microvascular disease	metabolism related
122		GSK-3 beta	Wnt signaling pathway	Microvascular disease	apoptosis related
123	41	IL1RN	IL related signaling pathway	DN£¬Microvascular disease	immune related
124	42	MLYCD	propanoate metabolism	DN£¬Microvascular disease	metabolism related
125		MLYCD	apoptosis	DN£¬Microvascular disease	apoptosis related
126		MLYCD	AMPK signaling pathway	DN£¬Microvascular disease	multi-pathway related
127	43	mTOR	HIF-1 signaling pathway	DN£¬Microvascular disease	apoptosis related
128		mTOR	phospholipase D signaling pathway	DN£¬Microvascular disease	immune related
129		mTOR	PI3K-Akt signaling pathway	DN£¬Microvascular disease	apoptosis related
130		mTOR	AMPK signaling pathway	DN£¬Microvascular disease	multi-pathway related
131		mTOR	JAK-STAT signaling pathway	DN£¬Microvascular disease	multi-pathway related
132		mTOR	insulin related signaling pathway	DN£¬Microvascular disease	metabolism related
133		mTOR	metabolism of lipid	DN£¬Microvascular disease	metabolism related
134		mTOR	insulin related signaling pathway	DN£¬Microvascular disease	metabolism related
135	44	SOD2	TNF related pathway	DN£¬Microvascular disease	immune related
136		SOD2	TGF-¦Â related pathway	DN£¬Microvascular disease	immune related
137		SOD2	foxO signaling pathway	DN£¬Microvascular disease	apoptosis related
138		SOD2	apoptosis	DN£¬Microvascular disease	apoptosis related
139	1	ACC1	astragaloside¢ô	Diabetes mellitus	molecule
140		ACC1	Morroniside	Diabetes mellitus	molecule
141		ACC1	wogonin	Diabetes mellitus	molecule
142		ACC1	kaempferide	Diabetes mellitus	molecule
143	2	ACC1	astragaloside¢ô	Diabetes mellitus	molecule
144		ACC1	Morroniside	Diabetes mellitus	molecule
145		ACC1	rutin	Diabetes mellitus	molecule
146	3	CRAT	Morroniside	Diabetes mellitus	molecule
147		CRAT	wogonin	Diabetes mellitus	molecule
148		CRAT	kaempferide	Diabetes mellitus	molecule
149	4	CBG	ferulic acid	Diabetes mellitus	molecule
150		CBG	kaempferide	Diabetes mellitus	molecule
151	5	DPP-IV	astragaloside¢ô	Diabetes mellitus	molecule
152		DPP-IV	Morroniside	Diabetes mellitus	molecule
153		DPP-IV	rutin	Diabetes mellitus	molecule
154	6	FAOX	wogonin	Diabetes mellitus	molecule
155	7	GLPR-1	astragaloside¢ô	Diabetes mellitus	molecule
156		GLPR-1	Morroniside	Diabetes mellitus	molecule
157		GLPR-1	wogonin	Diabetes mellitus	molecule
158		GLPR-1	kaempferide	Diabetes mellitus	molecule
159	8	IR	Morroniside	Diabetes mellitus	molecule
160	9	KHK	astragaloside¢ô	Diabetes mellitus	molecule
161		KHK	rutin	Diabetes mellitus	molecule
162	10	MGAM	astragaloside¢ô	Diabetes mellitus	molecule
163		MGAM	Morroniside	Diabetes mellitus	molecule
164		MGAM	ferulic acid	Diabetes mellitus	molecule
165		MGAM	wogonin	Diabetes mellitus	molecule
166		MGAM	kaempferide	Diabetes mellitus	molecule
167	11	Pepsin 3A	ferulic acid	Diabetes mellitus	molecule
168		Pepsin 3A	wogonin	Diabetes mellitus	molecule
169		Pepsin 3A	kaempferide	Diabetes mellitus	molecule
170	12	PKC-B	Morroniside	Diabetes mellitus	molecule
171	13	PDHK2	astragaloside¢ô	Diabetes mellitus	molecule
172		PDHK2	Morroniside	Diabetes mellitus	molecule
173		PDHK2	rutin	Diabetes mellitus	molecule
174	14	RXRa	astragaloside¢ô	Diabetes mellitus	molecule
175		RXRa	Morroniside	Diabetes mellitus	molecule
176		RXRa	ferulic acid	Diabetes mellitus	molecule
177		RXRa	rutin	Diabetes mellitus	molecule
178		RXRa	wogonin	Diabetes mellitus	molecule
179		RXRa	kaempferide	Diabetes mellitus	molecule
180	15	TNF-¦Á	astragaloside¢ô	Diabetes mellitus	molecule
181		TNF-¦Á	Morroniside	Diabetes mellitus	molecule
182	16	V2R	ferulic acid	Diabetes mellitus	molecule
183	17	CD6	Morroniside	Diabetes mellitus type 1	molecule
184		CD6	wogonin	Diabetes mellitus type 1	molecule
185		CD6	kaempferide	Diabetes mellitus type 1	molecule
186	18	ERR-¦Á	Morroniside	Diabetes mellitus type 2	molecule
187	19	GIPR	ferulic acid	Diabetes mellitus type 2	molecule
188	20	GCGR	astragaloside¢ô	Diabetes mellitus type 2	molecule
189		GCGR	Morroniside	Diabetes mellitus type 2	molecule
190		GCGR	wogonin	Diabetes mellitus type 2	molecule
191		GCGR	kaempferide	Diabetes mellitus type 2	molecule
192	21	PI3K	Morroniside	Diabetes mellitus type 2	molecule
193	22	P2Y1	astragaloside¢ô	Diabetes mellitus type 2	molecule
194		P2Y1	Morroniside	Diabetes mellitus type 2	molecule
195		P2Y1	wogonin	Diabetes mellitus type 2	molecule
196		P2Y1	kaempferide	Diabetes mellitus type 2	molecule
197	23	SIRT1	Morroniside	Diabetes mellitus type 2	molecule
198	24	SIRT2	Morroniside	Diabetes mellitus type 2	molecule
199		SIRT2	kaempferide	Diabetes mellitus type 2	molecule
200	25	ADORA2A	Morroniside	Diabetic nephropathy	molecule
201	26	ALD	Morroniside	Diabetic nephropathy	molecule
202		ALD	kaempferide	Diabetic nephropathy	molecule
203	27	CCR5	astragaloside¢ô	Diabetic nephropathy	molecule
204		CCR5	Morroniside	Diabetic nephropathy	molecule
205		CCR5	rutin	Diabetic nephropathy	molecule
206		CCR5	wogonin	Diabetic nephropathy	molecule
207	28	CGB-PDE	astragaloside¢ô	Diabetic nephropathy	molecule
208	29	COX2	astragaloside¢ô	Diabetic nephropathy	molecule
209		COX2	Morroniside	Diabetic nephropathy	molecule
210		COX2	ferulic acid	Diabetic nephropathy	molecule
211		COX2	rutin	Diabetic nephropathy	molecule
212		COX2	wogonin	Diabetic nephropathy	molecule
213	30	FGF	astragaloside¢ô	Diabetic nephropathy	molecule
214		FGF	Morroniside	Diabetic nephropathy	molecule
215	31	JAK1	Morroniside	Diabetic nephropathy	molecule
216		JAK1	kaempferide	Diabetic nephropathy	molecule
217	32	KLK1	astragaloside¢ô	molecule	molecule
218		KLK1	Morroniside	molecule	molecule
219		KLK1	kaempferide	molecule	molecule
220	33	NEP	kaempferide	molecule	molecule
221	34	PRDX4	Morroniside	molecule	molecule
222		PRDX4	kaempferide	molecule	molecule
223	35	ROCK1	Morroniside	molecule	molecule
224	36	SHE	Morroniside	molecule	molecule
225		SHE	kaempferide	molecule	molecule
226	37	TGFR-1	Morroniside	molecule	molecule
227		TGFR-1	wogonin	molecule	molecule
228		TGFR-1	kaempferide	molecule	molecule
229	38	JAK2	Morroniside	molecule	molecule
230	39	HAPN	Morroniside	molecule	molecule
231		HAPN	wogonin	molecule	molecule
232		HAPN	kaempferide	molecule	molecule
233	40	CD	astragaloside¢ô	molecule	molecule
234		CD	Morroniside	molecule	molecule
235		CD	rutin	molecule	molecule
236	41	CT2	astragaloside¢ô	molecule	molecule
237		CT2	Morroniside	molecule	molecule
238		CT2	wogonin	molecule	molecule
239		CT2	kaempferide	molecule	molecule
240	42	GSK-3 beta	rutin	molecule	molecule
241	43	PDJ-1	Morroniside	molecule	molecule
242	44	IL1RN	astragaloside¢ô	molecule	molecule
243		IL1RN	Morroniside	molecule	molecule
244		IL1RN	wogonin	molecule	molecule
245		IL1RN	kaempferide	molecule	molecule
246	45	MLYCD	Morroniside	molecule	molecule
247		MLYCD	rutin	molecule	molecule
248	46	mTOR	astragaloside¢ô	molecule	molecule
249	47	SOD2	Morroniside	molecule	molecule
250		SOD2	wogonin	molecule	molecule
