# Supplementary figures and images for: Revealing Synergistic Mechanism of Multiple Components in Gandi Capsule for Diabetic Nephropathy Therapeutics by Network Pharmacology
Source: Hindawi journal article supplement (doi:10.1155/2018/6503126), 2018-01-01

# Graphical Abstract

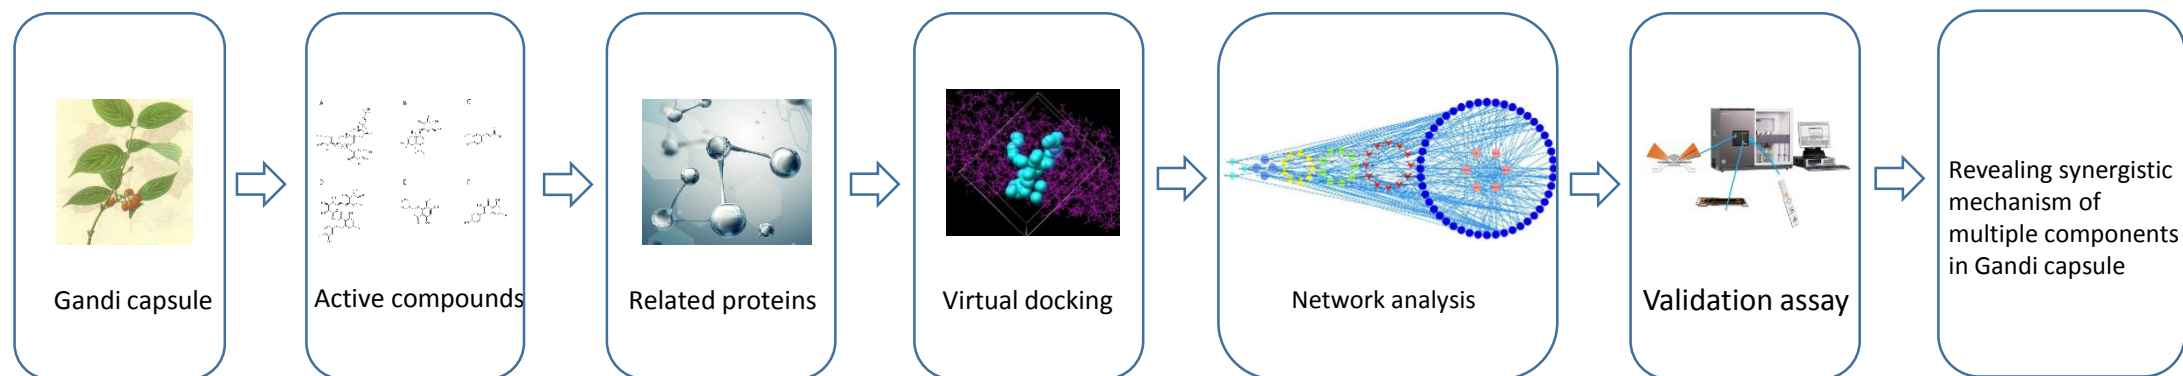

Supplement: f1 [file 6503126.f1.zip]
